# Supplementary material
Source: publisher figshare collection journal article supplement (https://brill.figshare.com/ndownloader/files/27047318)
Supplement: Supplementary file 1 [file 27047318]

<?xml version="1.0" encoding="UTF-8"?><TreegraphDocument xmlns="http://bioinfweb.info/xmlns/xtg" xmlns:xsi="http://www.w3.org/2001/XMLSchema-instance" xsi:schemaLocation="http://bioinfweb.info/xmlns/xtg http://bioinfweb.info/xmlns/xtg/1.5.xsd"><GlobalFormats BgColor="#FFFFFF" BranchLengthScale="354.70984" ShowScaleBar="false" ShowRooted="true" AlignToSubtree="true" LabelsLeft="true"><DocMargin Left="2.0" Top="2.0" Right="2.0" Bottom="2.0"></DocMargin></GlobalFormats><NodeBranchDataAdapters><Adapter Name="info.bioinfweb.treegraph.nodeName" Purpose="info.bioinfweb.treegraph.defaultLeavesAdapter"></Adapter><Adapter Name="info.bioinfweb.treegraph.textLabelAdapter" ID="support" Purpose="info.bioinfweb.treegraph.defaultSupportAdapter"></Adapter></NodeBranchDataAdapters><Tree><Node UniqueName="64woz70mhb" TextColor="#000000" TextHeight="6.0" TextStyle="" FontFamily="Arial" DecimalFormat="#0.0#####" LocaleLang="en" LocaleCountry="" LocaleVariant="" LineColor="#000000" LineWidth="0.3" EdgeRadius="1.0"><LeafMargin Left="1.0" Top="0.3" Right="1.0" Bottom="0.3"></LeafMargin><Branch LineColor="#000000" LineWidth="0.3" ConstantWidth="false" MinLength="4.0" MinSpaceAbove="0.0" MinSpaceBelow="0.0"></Branch><Node Text="Root" IsDecimal="false" UniqueName="44exf0xiku" TextColor="#000000" TextHeight="6.0" TextStyle="" FontFamily="Arial" DecimalFormat="#0.0#####" LocaleLang="en" LocaleCountry="" LocaleVariant="" LineColor="#000000" LineWidth="0.3" EdgeRadius="1.0"><LeafMargin Left="1.0" Top="0.3" Right="1.0" Bottom="0.3"></LeafMargin><Branch Length="0.1529653" LineColor="#000000" LineWidth="0.3" ConstantWidth="false" MinLength="4.0" MinSpaceAbove="0.0" MinSpaceBelow="0.0"><PieChartLabel TextColor="#000000" TextHeight="6.0" TextStyle="" FontFamily="Arial" DecimalFormat="#0.0#####" LocaleLang="en" LocaleCountry="" LocaleVariant="" LineColor="#000000" LineWidth="0.3" Width="6.0" Height="6.0" InternalLines="true" NullLines="false" ShowTitle="false" CaptionType="NONE" CaptionLinkType="STRAIGHT_LINES" Id="6" Above="true" LineNo="0" LinePos="0.0"><LabelMargin Left="1.0" Top="1.0" Right="1.0" Bottom="1.0"></LabelMargin><DataIds TextColor="#000000" TextStyle="" FontFamily="Arial" DecimalFormat="#0.0#####" LocaleLang="en" LocaleCountry="" LocaleVariant=""><DataId PieColor="#0000FF" PieCaption="">6.0</DataId><DataId PieColor="#FF0000" PieCaption="">6.1</DataId></DataIds></PieChartLabel><InvisibleData Id="6.0" Text="0.629881" IsDecimal="true"></InvisibleData><InvisibleData Id="6.1" Text="0.370119" IsDecimal="true"></InvisibleData></Branch></Node><Node Text="Ontholestes murinus JF889840 1" IsDecimal="false" UniqueName="k90w36k25q" TextColor="#000000" TextHeight="6.0" TextStyle="" FontFamily="Arial" DecimalFormat="#0.0#####" LocaleLang="en" LocaleCountry="" LocaleVariant="" LineColor="#000000" LineWidth="0.3" EdgeRadius="1.0"><LeafMargin Left="1.0" Top="0.3" Right="1.0" Bottom="0.3"></LeafMargin><Branch Length="0.09153701" LineColor="#000000" LineWidth="0.3" ConstantWidth="false" MinLength="4.0" MinSpaceAbove="0.0" MinSpaceBelow="0.0"></Branch></Node><Node Text="internalNode1" IsDecimal="false" UniqueName="k0cogdpgbi" TextColor="#000000" TextHeight="6.0" TextStyle="" FontFamily="Arial" DecimalFormat="#0.0#####" LocaleLang="en" LocaleCountry="" LocaleVariant="" LineColor="#000000" LineWidth="0.3" EdgeRadius="1.0"><LeafMargin Left="1.0" Top="0.3" Right="1.0" Bottom="0.3"></LeafMargin><Branch Length="0.02484799" LineColor="#000000" LineWidth="0.3" ConstantWidth="false" MinLength="4.0" MinSpaceAbove="0.0" MinSpaceBelow="0.0"><PieChartLabel TextColor="#000000" TextHeight="6.0" TextStyle="" FontFamily="Arial" DecimalFormat="#0.0#####" LocaleLang="en" LocaleCountry="" LocaleVariant="" LineColor="#000000" LineWidth="0.3" Width="6.0" Height="6.0" InternalLines="true" NullLines="false" ShowTitle="false" CaptionType="NONE" CaptionLinkType="STRAIGHT_LINES" Id="6" Above="true" LineNo="0" LinePos="0.0"><LabelMargin Left="1.0" Top="1.0" Right="1.0" Bottom="1.0"></LabelMargin><DataIds TextColor="#000000" TextStyle="" FontFamily="Arial" DecimalFormat="#0.0#####" LocaleLang="en" LocaleCountry="" LocaleVariant=""><DataId PieColor="#0000FF" PieCaption="">6.0</DataId><DataId PieColor="#FF0000" PieCaption="">6.1</DataId></DataIds></PieChartLabel><InvisibleData Id="6.0" Text="0.547034" IsDecimal="true"></InvisibleData><InvisibleData Id="6.1" Text="0.452966" IsDecimal="true"></InvisibleData></Branch><Node Text="internalNode2" IsDecimal="false" UniqueName="0cv4evv6wx" TextColor="#000000" TextHeight="6.0" TextStyle="" FontFamily="Arial" DecimalFormat="#0.0#####" LocaleLang="en" LocaleCountry="" LocaleVariant="" LineColor="#000000" LineWidth="0.3" EdgeRadius="1.0"><LeafMargin Left="1.0" Top="0.3" Right="1.0" Bottom="0.3"></LeafMargin><Branch Length="0.07979765" LineColor="#000000" LineWidth="0.3" ConstantWidth="false" MinLength="4.0" MinSpaceAbove="0.0" MinSpaceBelow="0.0"><PieChartLabel TextColor="#000000" TextHeight="6.0" TextStyle="" FontFamily="Arial" DecimalFormat="#0.0#####" LocaleLang="en" LocaleCountry="" LocaleVariant="" LineColor="#000000" LineWidth="0.3" Width="6.0" Height="6.0" InternalLines="true" NullLines="false" ShowTitle="false" CaptionType="NONE" CaptionLinkType="STRAIGHT_LINES" Id="6" Above="true" LineNo="0" LinePos="0.0"><LabelMargin Left="1.0" Top="1.0" Right="1.0" Bottom="1.0"></LabelMargin><DataIds TextColor="#000000" TextStyle="" FontFamily="Arial" DecimalFormat="#0.0#####" LocaleLang="en" LocaleCountry="" LocaleVariant=""><DataId PieColor="#0000FF" PieCaption="">6.0</DataId><DataId PieColor="#FF0000" PieCaption="">6.1</DataId></DataIds></PieChartLabel><InvisibleData Id="6.0" Text="0.551084" IsDecimal="true"></InvisibleData><InvisibleData Id="6.1" Text="0.448916" IsDecimal="true"></InvisibleData></Branch><Node Text="internalNode3" IsDecimal="false" UniqueName="l85fto66iq" TextColor="#000000" TextHeight="6.0" TextStyle="" FontFamily="Arial" DecimalFormat="#0.0#####" LocaleLang="en" LocaleCountry="" LocaleVariant="" LineColor="#000000" LineWidth="0.3" EdgeRadius="1.0"><LeafMargin Left="1.0" Top="0.3" Right="1.0" Bottom="0.3"></LeafMargin><Branch Length="0.03892916" LineColor="#000000" LineWidth="0.3" ConstantWidth="false" MinLength="4.0" MinSpaceAbove="0.0" MinSpaceBelow="0.0"><PieChartLabel TextColor="#000000" TextHeight="6.0" TextStyle="" FontFamily="Arial" DecimalFormat="#0.0#####" LocaleLang="en" LocaleCountry="" LocaleVariant="" LineColor="#000000" LineWidth="0.3" Width="6.0" Height="6.0" InternalLines="true" NullLines="false" ShowTitle="false" CaptionType="NONE" CaptionLinkType="STRAIGHT_LINES" Id="6" Above="true" LineNo="0" LinePos="0.0"><LabelMargin Left="1.0" Top="1.0" Right="1.0" Bottom="1.0"></LabelMargin><DataIds TextColor="#000000" TextStyle="" FontFamily="Arial" DecimalFormat="#0.0#####" LocaleLang="en" LocaleCountry="" LocaleVariant=""><DataId PieColor="#0000FF" PieCaption="">6.0</DataId><DataId PieColor="#FF0000" PieCaption="">6.1</DataId></DataIds></PieChartLabel><InvisibleData Id="6.0" Text="0.481582" IsDecimal="true"></InvisibleData><InvisibleData Id="6.1" Text="0.518418" IsDecimal="true"></InvisibleData></Branch><Node Text="Oxyporus P cyanipennis PrimKr01 19 186" IsDecimal="false" UniqueName="56vuty0ft0" TextColor="#000000" TextHeight="6.0" TextStyle="" FontFamily="Arial" DecimalFormat="#0.0#####" LocaleLang="en" LocaleCountry="" LocaleVariant="" LineColor="#000000" LineWidth="0.3" EdgeRadius="1.0"><LeafMargin Left="1.0" Top="0.3" Right="1.0" Bottom="0.3"></LeafMargin><Branch Length="0.05012421" LineColor="#000000" LineWidth="0.3" ConstantWidth="false" MinLength="4.0" MinSpaceAbove="0.0" MinSpaceBelow="0.0"></Branch></Node><Node Text="internalNode4" IsDecimal="false" UniqueName="983pa6bib6" TextColor="#000000" TextHeight="6.0" TextStyle="" FontFamily="Arial" DecimalFormat="#0.0#####" LocaleLang="en" LocaleCountry="" LocaleVariant="" LineColor="#000000" LineWidth="0.3" EdgeRadius="1.0"><LeafMargin Left="1.0" Top="0.3" Right="1.0" Bottom="0.3"></LeafMargin><Branch Length="0.02066984" LineColor="#000000" LineWidth="0.3" ConstantWidth="false" MinLength="4.0" MinSpaceAbove="0.0" MinSpaceBelow="0.0"><PieChartLabel TextColor="#000000" TextHeight="6.0" TextStyle="" FontFamily="Arial" DecimalFormat="#0.0#####" LocaleLang="en" LocaleCountry="" LocaleVariant="" LineColor="#000000" LineWidth="0.3" Width="6.0" Height="6.0" InternalLines="true" NullLines="false" ShowTitle="false" CaptionType="NONE" CaptionLinkType="STRAIGHT_LINES" Id="6" Above="true" LineNo="0" LinePos="0.0"><LabelMargin Left="1.0" Top="1.0" Right="1.0" Bottom="1.0"></LabelMargin><DataIds TextColor="#000000" TextStyle="" FontFamily="Arial" DecimalFormat="#0.0#####" LocaleLang="en" LocaleCountry="" LocaleVariant=""><DataId PieColor="#0000FF" PieCaption="">6.0</DataId><DataId PieColor="#FF0000" PieCaption="">6.1</DataId></DataIds></PieChartLabel><InvisibleData Id="6.0" Text="0.285258" IsDecimal="true"></InvisibleData><InvisibleData Id="6.1" Text="0.714742" IsDecimal="true"></InvisibleData></Branch><Node Text="internalNode5" IsDecimal="false" UniqueName="rv9axn1hqr" TextColor="#000000" TextHeight="6.0" TextStyle="" FontFamily="Arial" DecimalFormat="#0.0#####" LocaleLang="en" LocaleCountry="" LocaleVariant="" LineColor="#000000" LineWidth="0.3" EdgeRadius="1.0"><LeafMargin Left="1.0" Top="0.3" Right="1.0" Bottom="0.3"></LeafMargin><Branch Length="0.04482259" LineColor="#000000" LineWidth="0.3" ConstantWidth="false" MinLength="4.0" MinSpaceAbove="0.0" MinSpaceBelow="0.0"><PieChartLabel TextColor="#000000" TextHeight="6.0" TextStyle="" FontFamily="Arial" DecimalFormat="#0.0#####" LocaleLang="en" LocaleCountry="" LocaleVariant="" LineColor="#000000" LineWidth="0.3" Width="6.0" Height="6.0" InternalLines="true" NullLines="false" ShowTitle="false" CaptionType="NONE" CaptionLinkType="STRAIGHT_LINES" Id="6" Above="true" LineNo="0" LinePos="0.0"><LabelMargin Left="1.0" Top="1.0" Right="1.0" Bottom="1.0"></LabelMargin><DataIds TextColor="#000000" TextStyle="" FontFamily="Arial" DecimalFormat="#0.0#####" LocaleLang="en" LocaleCountry="" LocaleVariant=""><DataId PieColor="#0000FF" PieCaption="">6.0</DataId><DataId PieColor="#FF0000" PieCaption="">6.1</DataId></DataIds></PieChartLabel><InvisibleData Id="6.0" Text="0.131617" IsDecimal="true"></InvisibleData><InvisibleData Id="6.1" Text="0.868383" IsDecimal="true"></InvisibleData></Branch><Node Text="internalNode6" IsDecimal="false" UniqueName="1pfv7qco8m" TextColor="#000000" TextHeight="6.0" TextStyle="" FontFamily="Arial" DecimalFormat="#0.0#####" LocaleLang="en" LocaleCountry="" LocaleVariant="" LineColor="#000000" LineWidth="0.3" EdgeRadius="1.0"><LeafMargin Left="1.0" Top="0.3" Right="1.0" Bottom="0.3"></LeafMargin><Branch Length="0.06337272" LineColor="#000000" LineWidth="0.3" ConstantWidth="false" MinLength="4.0" MinSpaceAbove="0.0" MinSpaceBelow="0.0"><PieChartLabel TextColor="#000000" TextHeight="6.0" TextStyle="" FontFamily="Arial" DecimalFormat="#0.0#####" LocaleLang="en" LocaleCountry="" LocaleVariant="" LineColor="#000000" LineWidth="0.3" Width="6.0" Height="6.0" InternalLines="true" NullLines="false" ShowTitle="false" CaptionType="NONE" CaptionLinkType="STRAIGHT_LINES" Id="6" Above="true" LineNo="0" LinePos="0.0"><LabelMargin Left="1.0" Top="1.0" Right="1.0" Bottom="1.0"></LabelMargin><DataIds TextColor="#000000" TextStyle="" FontFamily="Arial" DecimalFormat="#0.0#####" LocaleLang="en" LocaleCountry="" LocaleVariant=""><DataId PieColor="#0000FF" PieCaption="">6.0</DataId><DataId PieColor="#FF0000" PieCaption="">6.1</DataId></DataIds></PieChartLabel><InvisibleData Id="6.0" Text="1.81E-4" IsDecimal="true"></InvisibleData><InvisibleData Id="6.1" Text="0.999819" IsDecimal="true"></InvisibleData></Branch><Node Text="Oxyporus P dybowskii Altay19 34b 17" IsDecimal="false" UniqueName="7c80g71eag" TextColor="#000000" TextHeight="6.0" TextStyle="" FontFamily="Arial" DecimalFormat="#0.0#####" LocaleLang="en" LocaleCountry="" LocaleVariant="" LineColor="#000000" LineWidth="0.3" EdgeRadius="1.0"><LeafMargin Left="1.0" Top="0.3" Right="1.0" Bottom="0.3"></LeafMargin><Branch Length="0.01077851" LineColor="#000000" LineWidth="0.3" ConstantWidth="false" MinLength="4.0" MinSpaceAbove="0.0" MinSpaceBelow="0.0"></Branch></Node><Node Text="Oxyporus P dybowskii CNUIC567" IsDecimal="false" UniqueName="d0k7ji3lt9" TextColor="#000000" TextHeight="6.0" TextStyle="" FontFamily="Arial" DecimalFormat="#0.0#####" LocaleLang="en" LocaleCountry="" LocaleVariant="" LineColor="#000000" LineWidth="0.3" EdgeRadius="1.0"><LeafMargin Left="1.0" Top="0.3" Right="1.0" Bottom="0.3"></LeafMargin><Branch Length="0.01593421" LineColor="#000000" LineWidth="0.3" ConstantWidth="false" MinLength="4.0" MinSpaceAbove="0.0" MinSpaceBelow="0.0"></Branch></Node></Node><Node Text="internalNode7" IsDecimal="false" UniqueName="u04n6g45bd" TextColor="#000000" TextHeight="6.0" TextStyle="" FontFamily="Arial" DecimalFormat="#0.0#####" LocaleLang="en" LocaleCountry="" LocaleVariant="" LineColor="#000000" LineWidth="0.3" EdgeRadius="1.0"><LeafMargin Left="1.0" Top="0.3" Right="1.0" Bottom="0.3"></LeafMargin><Branch Length="0.06309511" LineColor="#000000" LineWidth="0.3" ConstantWidth="false" MinLength="4.0" MinSpaceAbove="0.0" MinSpaceBelow="0.0"><PieChartLabel TextColor="#000000" TextHeight="6.0" TextStyle="" FontFamily="Arial" DecimalFormat="#0.0#####" LocaleLang="en" LocaleCountry="" LocaleVariant="" LineColor="#000000" LineWidth="0.3" Width="6.0" Height="6.0" InternalLines="true" NullLines="false" ShowTitle="false" CaptionType="NONE" CaptionLinkType="STRAIGHT_LINES" Id="6" Above="true" LineNo="0" LinePos="0.0"><LabelMargin Left="1.0" Top="1.0" Right="1.0" Bottom="1.0"></LabelMargin><DataIds TextColor="#000000" TextStyle="" FontFamily="Arial" DecimalFormat="#0.0#####" LocaleLang="en" LocaleCountry="" LocaleVariant=""><DataId PieColor="#0000FF" PieCaption="">6.0</DataId><DataId PieColor="#FF0000" PieCaption="">6.1</DataId></DataIds></PieChartLabel><InvisibleData Id="6.0" Text="1.0" IsDecimal="true"></InvisibleData><InvisibleData Id="6.1" Text="0.0" IsDecimal="true"></InvisibleData></Branch><Node Text="internalNode8" IsDecimal="false" UniqueName="61b0q2cmtq" TextColor="#000000" TextHeight="6.0" TextStyle="" FontFamily="Arial" DecimalFormat="#0.0#####" LocaleLang="en" LocaleCountry="" LocaleVariant="" LineColor="#000000" LineWidth="0.3" EdgeRadius="1.0"><LeafMargin Left="1.0" Top="0.3" Right="1.0" Bottom="0.3"></LeafMargin><Branch Length="0.004138651" LineColor="#000000" LineWidth="0.3" ConstantWidth="false" MinLength="4.0" MinSpaceAbove="0.0" MinSpaceBelow="0.0"><PieChartLabel TextColor="#000000" TextHeight="6.0" TextStyle="" FontFamily="Arial" DecimalFormat="#0.0#####" LocaleLang="en" LocaleCountry="" LocaleVariant="" LineColor="#000000" LineWidth="0.3" Width="6.0" Height="6.0" InternalLines="true" NullLines="false" ShowTitle="false" CaptionType="NONE" CaptionLinkType="STRAIGHT_LINES" Id="6" Above="true" LineNo="0" LinePos="0.0"><LabelMargin Left="1.0" Top="1.0" Right="1.0" Bottom="1.0"></LabelMargin><DataIds TextColor="#000000" TextStyle="" FontFamily="Arial" DecimalFormat="#0.0#####" LocaleLang="en" LocaleCountry="" LocaleVariant=""><DataId PieColor="#0000FF" PieCaption="">6.0</DataId><DataId PieColor="#FF0000" PieCaption="">6.1</DataId></DataIds></PieChartLabel><InvisibleData Id="6.0" Text="0.999996" IsDecimal="true"></InvisibleData><InvisibleData Id="6.1" Text="4.0E-6" IsDecimal="true"></InvisibleData></Branch><Node Text="Oxyporus occipitalis JF887772 1" IsDecimal="false" UniqueName="bv2pqdzr8t" TextColor="#000000" TextHeight="6.0" TextStyle="" FontFamily="Arial" DecimalFormat="#0.0#####" LocaleLang="en" LocaleCountry="" LocaleVariant="" LineColor="#000000" LineWidth="0.3" EdgeRadius="1.0"><LeafMargin Left="1.0" Top="0.3" Right="1.0" Bottom="0.3"></LeafMargin><Branch Length="0.001125864" LineColor="#000000" LineWidth="0.3" ConstantWidth="false" MinLength="4.0" MinSpaceAbove="0.0" MinSpaceBelow="0.0"></Branch></Node><Node Text="Oxyporus occipitalis KM850520 1" IsDecimal="false" UniqueName="ndiynmt2uw" TextColor="#000000" TextHeight="6.0" TextStyle="" FontFamily="Arial" DecimalFormat="#0.0#####" LocaleLang="en" LocaleCountry="" LocaleVariant="" LineColor="#000000" LineWidth="0.3" EdgeRadius="1.0"><LeafMargin Left="1.0" Top="0.3" Right="1.0" Bottom="0.3"></LeafMargin><Branch Length="0.001119014" LineColor="#000000" LineWidth="0.3" ConstantWidth="false" MinLength="4.0" MinSpaceAbove="0.0" MinSpaceBelow="0.0"></Branch></Node><Node Text="Oxyporus occipitalis5 KM842302" IsDecimal="false" UniqueName="kq83d9wgod" TextColor="#000000" TextHeight="6.0" TextStyle="" FontFamily="Arial" DecimalFormat="#0.0#####" LocaleLang="en" LocaleCountry="" LocaleVariant="" LineColor="#000000" LineWidth="0.3" EdgeRadius="1.0"><LeafMargin Left="1.0" Top="0.3" Right="1.0" Bottom="0.3"></LeafMargin><Branch Length="0.001050658" LineColor="#000000" LineWidth="0.3" ConstantWidth="false" MinLength="4.0" MinSpaceAbove="0.0" MinSpaceBelow="0.0"></Branch></Node></Node><Node Text="internalNode9" IsDecimal="false" UniqueName="aop7hjkhh5" TextColor="#000000" TextHeight="6.0" TextStyle="" FontFamily="Arial" DecimalFormat="#0.0#####" LocaleLang="en" LocaleCountry="" LocaleVariant="" LineColor="#000000" LineWidth="0.3" EdgeRadius="1.0"><LeafMargin Left="1.0" Top="0.3" Right="1.0" Bottom="0.3"></LeafMargin><Branch Length="0.002531579" LineColor="#000000" LineWidth="0.3" ConstantWidth="false" MinLength="4.0" MinSpaceAbove="0.0" MinSpaceBelow="0.0"><PieChartLabel TextColor="#000000" TextHeight="6.0" TextStyle="" FontFamily="Arial" DecimalFormat="#0.0#####" LocaleLang="en" LocaleCountry="" LocaleVariant="" LineColor="#000000" LineWidth="0.3" Width="6.0" Height="6.0" InternalLines="true" NullLines="false" ShowTitle="false" CaptionType="NONE" CaptionLinkType="STRAIGHT_LINES" Id="6" Above="true" LineNo="0" LinePos="0.0"><LabelMargin Left="1.0" Top="1.0" Right="1.0" Bottom="1.0"></LabelMargin><DataIds TextColor="#000000" TextStyle="" FontFamily="Arial" DecimalFormat="#0.0#####" LocaleLang="en" LocaleCountry="" LocaleVariant=""><DataId PieColor="#0000FF" PieCaption="">6.0</DataId><DataId PieColor="#FF0000" PieCaption="">6.1</DataId></DataIds></PieChartLabel><InvisibleData Id="6.0" Text="0.999415" IsDecimal="true"></InvisibleData><InvisibleData Id="6.1" Text="5.85E-4" IsDecimal="true"></InvisibleData></Branch><Node Text="internalNode10" IsDecimal="false" UniqueName="833hqvshgn" TextColor="#000000" TextHeight="6.0" TextStyle="" FontFamily="Arial" DecimalFormat="#0.0#####" LocaleLang="en" LocaleCountry="" LocaleVariant="" LineColor="#000000" LineWidth="0.3" EdgeRadius="1.0"><LeafMargin Left="1.0" Top="0.3" Right="1.0" Bottom="0.3"></LeafMargin><Branch Length="0.002528061" LineColor="#000000" LineWidth="0.3" ConstantWidth="false" MinLength="4.0" MinSpaceAbove="0.0" MinSpaceBelow="0.0"><PieChartLabel TextColor="#000000" TextHeight="6.0" TextStyle="" FontFamily="Arial" DecimalFormat="#0.0#####" LocaleLang="en" LocaleCountry="" LocaleVariant="" LineColor="#000000" LineWidth="0.3" Width="6.0" Height="6.0" InternalLines="true" NullLines="false" ShowTitle="false" CaptionType="NONE" CaptionLinkType="STRAIGHT_LINES" Id="6" Above="true" LineNo="0" LinePos="0.0"><LabelMargin Left="1.0" Top="1.0" Right="1.0" Bottom="1.0"></LabelMargin><DataIds TextColor="#000000" TextStyle="" FontFamily="Arial" DecimalFormat="#0.0#####" LocaleLang="en" LocaleCountry="" LocaleVariant=""><DataId PieColor="#0000FF" PieCaption="">6.0</DataId><DataId PieColor="#FF0000" PieCaption="">6.1</DataId></DataIds></PieChartLabel><InvisibleData Id="6.0" Text="0.999747" IsDecimal="true"></InvisibleData><InvisibleData Id="6.1" Text="2.53E-4" IsDecimal="true"></InvisibleData></Branch><Node Text="Oxyporus occipitalis KU875724 1" IsDecimal="false" UniqueName="0pndkyp0ol" TextColor="#000000" TextHeight="6.0" TextStyle="" FontFamily="Arial" DecimalFormat="#0.0#####" LocaleLang="en" LocaleCountry="" LocaleVariant="" LineColor="#000000" LineWidth="0.3" EdgeRadius="1.0"><LeafMargin Left="1.0" Top="0.3" Right="1.0" Bottom="0.3"></LeafMargin><Branch Length="0.001166645" LineColor="#000000" LineWidth="0.3" ConstantWidth="false" MinLength="4.0" MinSpaceAbove="0.0" MinSpaceBelow="0.0"></Branch></Node><Node Text="Oxyporus occipitalis1 KU875724" IsDecimal="false" UniqueName="ivyov5f38t" TextColor="#000000" TextHeight="6.0" TextStyle="" FontFamily="Arial" DecimalFormat="#0.0#####" LocaleLang="en" LocaleCountry="" LocaleVariant="" LineColor="#000000" LineWidth="0.3" EdgeRadius="1.0"><LeafMargin Left="1.0" Top="0.3" Right="1.0" Bottom="0.3"></LeafMargin><Branch Length="0.001066982" LineColor="#000000" LineWidth="0.3" ConstantWidth="false" MinLength="4.0" MinSpaceAbove="0.0" MinSpaceBelow="0.0"></Branch></Node></Node><Node Text="Oxyporus occipitalis2 KU875723" IsDecimal="false" UniqueName="yv9glam0hu" TextColor="#000000" TextHeight="6.0" TextStyle="" FontFamily="Arial" DecimalFormat="#0.0#####" LocaleLang="en" LocaleCountry="" LocaleVariant="" LineColor="#000000" LineWidth="0.3" EdgeRadius="1.0"><LeafMargin Left="1.0" Top="0.3" Right="1.0" Bottom="0.3"></LeafMargin><Branch Length="0.001142134" LineColor="#000000" LineWidth="0.3" ConstantWidth="false" MinLength="4.0" MinSpaceAbove="0.0" MinSpaceBelow="0.0"></Branch></Node></Node><Node Text="Oxyporus occipitalis3 KM850956" IsDecimal="false" UniqueName="2r9wb2b0ee" TextColor="#000000" TextHeight="6.0" TextStyle="" FontFamily="Arial" DecimalFormat="#0.0#####" LocaleLang="en" LocaleCountry="" LocaleVariant="" LineColor="#000000" LineWidth="0.3" EdgeRadius="1.0"><LeafMargin Left="1.0" Top="0.3" Right="1.0" Bottom="0.3"></LeafMargin><Branch Length="0.001059797" LineColor="#000000" LineWidth="0.3" ConstantWidth="false" MinLength="4.0" MinSpaceAbove="0.0" MinSpaceBelow="0.0"></Branch></Node><Node Text="Oxyporus occipitalis4 KM843321" IsDecimal="false" UniqueName="hi9ifh5z6l" TextColor="#000000" TextHeight="6.0" TextStyle="" FontFamily="Arial" DecimalFormat="#0.0#####" LocaleLang="en" LocaleCountry="" LocaleVariant="" LineColor="#000000" LineWidth="0.3" EdgeRadius="1.0"><LeafMargin Left="1.0" Top="0.3" Right="1.0" Bottom="0.3"></LeafMargin><Branch Length="0.001034767" LineColor="#000000" LineWidth="0.3" ConstantWidth="false" MinLength="4.0" MinSpaceAbove="0.0" MinSpaceBelow="0.0"></Branch></Node><Node Text="Oxyporus occipitalis6 KM844801" IsDecimal="false" UniqueName="sbjn091roz" TextColor="#000000" TextHeight="6.0" TextStyle="" FontFamily="Arial" DecimalFormat="#0.0#####" LocaleLang="en" LocaleCountry="" LocaleVariant="" LineColor="#000000" LineWidth="0.3" EdgeRadius="1.0"><LeafMargin Left="1.0" Top="0.3" Right="1.0" Bottom="0.3"></LeafMargin><Branch Length="0.00538531" LineColor="#000000" LineWidth="0.3" ConstantWidth="false" MinLength="4.0" MinSpaceAbove="0.0" MinSpaceBelow="0.0"></Branch></Node><Node Text="Oxyporus occipitalis7 KM844575" IsDecimal="false" UniqueName="e1xb30aupx" TextColor="#000000" TextHeight="6.0" TextStyle="" FontFamily="Arial" DecimalFormat="#0.0#####" LocaleLang="en" LocaleCountry="" LocaleVariant="" LineColor="#000000" LineWidth="0.3" EdgeRadius="1.0"><LeafMargin Left="1.0" Top="0.3" Right="1.0" Bottom="0.3"></LeafMargin><Branch Length="0.00104352" LineColor="#000000" LineWidth="0.3" ConstantWidth="false" MinLength="4.0" MinSpaceAbove="0.0" MinSpaceBelow="0.0"></Branch></Node></Node></Node><Node Text="internalNode11" IsDecimal="false" UniqueName="6r2ydp1v35" TextColor="#000000" TextHeight="6.0" TextStyle="" FontFamily="Arial" DecimalFormat="#0.0#####" LocaleLang="en" LocaleCountry="" LocaleVariant="" LineColor="#000000" LineWidth="0.3" EdgeRadius="1.0"><LeafMargin Left="1.0" Top="0.3" Right="1.0" Bottom="0.3"></LeafMargin><Branch Length="0.08931283" LineColor="#000000" LineWidth="0.3" ConstantWidth="false" MinLength="4.0" MinSpaceAbove="0.0" MinSpaceBelow="0.0"><PieChartLabel TextColor="#000000" TextHeight="6.0" TextStyle="" FontFamily="Arial" DecimalFormat="#0.0#####" LocaleLang="en" LocaleCountry="" LocaleVariant="" LineColor="#000000" LineWidth="0.3" Width="6.0" Height="6.0" InternalLines="true" NullLines="false" ShowTitle="false" CaptionType="NONE" CaptionLinkType="STRAIGHT_LINES" Id="6" Above="true" LineNo="0" LinePos="0.0"><LabelMargin Left="1.0" Top="1.0" Right="1.0" Bottom="1.0"></LabelMargin><DataIds TextColor="#000000" TextStyle="" FontFamily="Arial" DecimalFormat="#0.0#####" LocaleLang="en" LocaleCountry="" LocaleVariant=""><DataId PieColor="#0000FF" PieCaption="">6.0</DataId><DataId PieColor="#FF0000" PieCaption="">6.1</DataId></DataIds></PieChartLabel><InvisibleData Id="6.0" Text="0.9925" IsDecimal="true"></InvisibleData><InvisibleData Id="6.1" Text="0.0075" IsDecimal="true"></InvisibleData></Branch><Node Text="Oxyporus P melanocephalus CNUIC568" IsDecimal="false" UniqueName="qkkun3abrj" TextColor="#000000" TextHeight="6.0" TextStyle="" FontFamily="Arial" DecimalFormat="#0.0#####" LocaleLang="en" LocaleCountry="" LocaleVariant="" LineColor="#000000" LineWidth="0.3" EdgeRadius="1.0"><LeafMargin Left="1.0" Top="0.3" Right="1.0" Bottom="0.3"></LeafMargin><Branch Length="0.003793082" LineColor="#000000" LineWidth="0.3" ConstantWidth="false" MinLength="4.0" MinSpaceAbove="0.0" MinSpaceBelow="0.0"></Branch></Node><Node Text="internalNode12" IsDecimal="false" UniqueName="q54fowcg8q" TextColor="#000000" TextHeight="6.0" TextStyle="" FontFamily="Arial" DecimalFormat="#0.0#####" LocaleLang="en" LocaleCountry="" LocaleVariant="" LineColor="#000000" LineWidth="0.3" EdgeRadius="1.0"><LeafMargin Left="1.0" Top="0.3" Right="1.0" Bottom="0.3"></LeafMargin><Branch Length="0.01058519" LineColor="#000000" LineWidth="0.3" ConstantWidth="false" MinLength="4.0" MinSpaceAbove="0.0" MinSpaceBelow="0.0"><PieChartLabel TextColor="#000000" TextHeight="6.0" TextStyle="" FontFamily="Arial" DecimalFormat="#0.0#####" LocaleLang="en" LocaleCountry="" LocaleVariant="" LineColor="#000000" LineWidth="0.3" Width="6.0" Height="6.0" InternalLines="true" NullLines="false" ShowTitle="false" CaptionType="NONE" CaptionLinkType="STRAIGHT_LINES" Id="6" Above="true" LineNo="0" LinePos="0.0"><LabelMargin Left="1.0" Top="1.0" Right="1.0" Bottom="1.0"></LabelMargin><DataIds TextColor="#000000" TextStyle="" FontFamily="Arial" DecimalFormat="#0.0#####" LocaleLang="en" LocaleCountry="" LocaleVariant=""><DataId PieColor="#0000FF" PieCaption="">6.0</DataId><DataId PieColor="#FF0000" PieCaption="">6.1</DataId></DataIds></PieChartLabel><InvisibleData Id="6.0" Text="0.999398" IsDecimal="true"></InvisibleData><InvisibleData Id="6.1" Text="6.02E-4" IsDecimal="true"></InvisibleData></Branch><Node Text="internalNode13" IsDecimal="false" UniqueName="i6i7h5vbbh" TextColor="#000000" TextHeight="6.0" TextStyle="" FontFamily="Arial" DecimalFormat="#0.0#####" LocaleLang="en" LocaleCountry="" LocaleVariant="" LineColor="#000000" LineWidth="0.3" EdgeRadius="1.0"><LeafMargin Left="1.0" Top="0.3" Right="1.0" Bottom="0.3"></LeafMargin><Branch Length="0.002403118" LineColor="#000000" LineWidth="0.3" ConstantWidth="false" MinLength="4.0" MinSpaceAbove="0.0" MinSpaceBelow="0.0"><PieChartLabel TextColor="#000000" TextHeight="6.0" TextStyle="" FontFamily="Arial" DecimalFormat="#0.0#####" LocaleLang="en" LocaleCountry="" LocaleVariant="" LineColor="#000000" LineWidth="0.3" Width="6.0" Height="6.0" InternalLines="true" NullLines="false" ShowTitle="false" CaptionType="NONE" CaptionLinkType="STRAIGHT_LINES" Id="6" Above="true" LineNo="0" LinePos="0.0"><LabelMargin Left="1.0" Top="1.0" Right="1.0" Bottom="1.0"></LabelMargin><DataIds TextColor="#000000" TextStyle="" FontFamily="Arial" DecimalFormat="#0.0#####" LocaleLang="en" LocaleCountry="" LocaleVariant=""><DataId PieColor="#0000FF" PieCaption="">6.0</DataId><DataId PieColor="#FF0000" PieCaption="">6.1</DataId></DataIds></PieChartLabel><InvisibleData Id="6.0" Text="0.999781" IsDecimal="true"></InvisibleData><InvisibleData Id="6.1" Text="2.19E-4" IsDecimal="true"></InvisibleData></Branch><Node Text="Oxyporus P melanocephalus GornTaezhFE18" IsDecimal="false" UniqueName="wt0ms1whqs" TextColor="#000000" TextHeight="6.0" TextStyle="" FontFamily="Arial" DecimalFormat="#0.0#####" LocaleLang="en" LocaleCountry="" LocaleVariant="" LineColor="#000000" LineWidth="0.3" EdgeRadius="1.0"><LeafMargin Left="1.0" Top="0.3" Right="1.0" Bottom="0.3"></LeafMargin><Branch Length="0.001027396" LineColor="#000000" LineWidth="0.3" ConstantWidth="false" MinLength="4.0" MinSpaceAbove="0.0" MinSpaceBelow="0.0"></Branch></Node><Node Text="Oxyporus P melanocephalus larvaGornTaezhFE18" IsDecimal="false" UniqueName="qkl8a40vwc" TextColor="#000000" TextHeight="6.0" TextStyle="" FontFamily="Arial" DecimalFormat="#0.0#####" LocaleLang="en" LocaleCountry="" LocaleVariant="" LineColor="#000000" LineWidth="0.3" EdgeRadius="1.0"><LeafMargin Left="1.0" Top="0.3" Right="1.0" Bottom="0.3"></LeafMargin><Branch Length="0.001047888" LineColor="#000000" LineWidth="0.3" ConstantWidth="false" MinLength="4.0" MinSpaceAbove="0.0" MinSpaceBelow="0.0"></Branch></Node></Node><Node Text="Oxyporus P melanocephalus ListvFE19 30" IsDecimal="false" UniqueName="sfu465o8qa" TextColor="#000000" TextHeight="6.0" TextStyle="" FontFamily="Arial" DecimalFormat="#0.0#####" LocaleLang="en" LocaleCountry="" LocaleVariant="" LineColor="#000000" LineWidth="0.3" EdgeRadius="1.0"><LeafMargin Left="1.0" Top="0.3" Right="1.0" Bottom="0.3"></LeafMargin><Branch Length="0.001237155" LineColor="#000000" LineWidth="0.3" ConstantWidth="false" MinLength="4.0" MinSpaceAbove="0.0" MinSpaceBelow="0.0"></Branch></Node></Node></Node></Node></Node><Node Text="internalNode14" IsDecimal="false" UniqueName="b734njduiv" TextColor="#000000" TextHeight="6.0" TextStyle="" FontFamily="Arial" DecimalFormat="#0.0#####" LocaleLang="en" LocaleCountry="" LocaleVariant="" LineColor="#000000" LineWidth="0.3" EdgeRadius="1.0"><LeafMargin Left="1.0" Top="0.3" Right="1.0" Bottom="0.3"></LeafMargin><Branch Length="0.07895561" LineColor="#000000" LineWidth="0.3" ConstantWidth="false" MinLength="4.0" MinSpaceAbove="0.0" MinSpaceBelow="0.0"><PieChartLabel TextColor="#000000" TextHeight="6.0" TextStyle="" FontFamily="Arial" DecimalFormat="#0.0#####" LocaleLang="en" LocaleCountry="" LocaleVariant="" LineColor="#000000" LineWidth="0.3" Width="6.0" Height="6.0" InternalLines="true" NullLines="false" ShowTitle="false" CaptionType="NONE" CaptionLinkType="STRAIGHT_LINES" Id="6" Above="true" LineNo="0" LinePos="0.0"><LabelMargin Left="1.0" Top="1.0" Right="1.0" Bottom="1.0"></LabelMargin><DataIds TextColor="#000000" TextStyle="" FontFamily="Arial" DecimalFormat="#0.0#####" LocaleLang="en" LocaleCountry="" LocaleVariant=""><DataId PieColor="#0000FF" PieCaption="">6.0</DataId><DataId PieColor="#FF0000" PieCaption="">6.1</DataId></DataIds></PieChartLabel><InvisibleData Id="6.0" Text="0.774356" IsDecimal="true"></InvisibleData><InvisibleData Id="6.1" Text="0.225644" IsDecimal="true"></InvisibleData></Branch><Node Text="internalNode15" IsDecimal="false" UniqueName="po52eajj0d" TextColor="#000000" TextHeight="6.0" TextStyle="" FontFamily="Arial" DecimalFormat="#0.0#####" LocaleLang="en" LocaleCountry="" LocaleVariant="" LineColor="#000000" LineWidth="0.3" EdgeRadius="1.0"><LeafMargin Left="1.0" Top="0.3" Right="1.0" Bottom="0.3"></LeafMargin><Branch Length="0.02158817" LineColor="#000000" LineWidth="0.3" ConstantWidth="false" MinLength="4.0" MinSpaceAbove="0.0" MinSpaceBelow="0.0"><PieChartLabel TextColor="#000000" TextHeight="6.0" TextStyle="" FontFamily="Arial" DecimalFormat="#0.0#####" LocaleLang="en" LocaleCountry="" LocaleVariant="" LineColor="#000000" LineWidth="0.3" Width="6.0" Height="6.0" InternalLines="true" NullLines="false" ShowTitle="false" CaptionType="NONE" CaptionLinkType="STRAIGHT_LINES" Id="6" Above="true" LineNo="0" LinePos="0.0"><LabelMargin Left="1.0" Top="1.0" Right="1.0" Bottom="1.0"></LabelMargin><DataIds TextColor="#000000" TextStyle="" FontFamily="Arial" DecimalFormat="#0.0#####" LocaleLang="en" LocaleCountry="" LocaleVariant=""><DataId PieColor="#0000FF" PieCaption="">6.0</DataId><DataId PieColor="#FF0000" PieCaption="">6.1</DataId></DataIds></PieChartLabel><InvisibleData Id="6.0" Text="0.825726" IsDecimal="true"></InvisibleData><InvisibleData Id="6.1" Text="0.174274" IsDecimal="true"></InvisibleData></Branch><Node Text="internalNode16" IsDecimal="false" UniqueName="5secv9josr" TextColor="#000000" TextHeight="6.0" TextStyle="" FontFamily="Arial" DecimalFormat="#0.0#####" LocaleLang="en" LocaleCountry="" LocaleVariant="" LineColor="#000000" LineWidth="0.3" EdgeRadius="1.0"><LeafMargin Left="1.0" Top="0.3" Right="1.0" Bottom="0.3"></LeafMargin><Branch Length="0.02634827" LineColor="#000000" LineWidth="0.3" ConstantWidth="false" MinLength="4.0" MinSpaceAbove="0.0" MinSpaceBelow="0.0"><PieChartLabel TextColor="#000000" TextHeight="6.0" TextStyle="" FontFamily="Arial" DecimalFormat="#0.0#####" LocaleLang="en" LocaleCountry="" LocaleVariant="" LineColor="#000000" LineWidth="0.3" Width="6.0" Height="6.0" InternalLines="true" NullLines="false" ShowTitle="false" CaptionType="NONE" CaptionLinkType="STRAIGHT_LINES" Id="6" Above="true" LineNo="0" LinePos="0.0"><LabelMargin Left="1.0" Top="1.0" Right="1.0" Bottom="1.0"></LabelMargin><DataIds TextColor="#000000" TextStyle="" FontFamily="Arial" DecimalFormat="#0.0#####" LocaleLang="en" LocaleCountry="" LocaleVariant=""><DataId PieColor="#0000FF" PieCaption="">6.0</DataId><DataId PieColor="#FF0000" PieCaption="">6.1</DataId></DataIds></PieChartLabel><InvisibleData Id="6.0" Text="0.884779" IsDecimal="true"></InvisibleData><InvisibleData Id="6.1" Text="0.115221" IsDecimal="true"></InvisibleData></Branch><Node Text="internalNode17" IsDecimal="false" UniqueName="sfnfhcfp50" TextColor="#000000" TextHeight="6.0" TextStyle="" FontFamily="Arial" DecimalFormat="#0.0#####" LocaleLang="en" LocaleCountry="" LocaleVariant="" LineColor="#000000" LineWidth="0.3" EdgeRadius="1.0"><LeafMargin Left="1.0" Top="0.3" Right="1.0" Bottom="0.3"></LeafMargin><Branch Length="0.03898149" LineColor="#000000" LineWidth="0.3" ConstantWidth="false" MinLength="4.0" MinSpaceAbove="0.0" MinSpaceBelow="0.0"><PieChartLabel TextColor="#000000" TextHeight="6.0" TextStyle="" FontFamily="Arial" DecimalFormat="#0.0#####" LocaleLang="en" LocaleCountry="" LocaleVariant="" LineColor="#000000" LineWidth="0.3" Width="6.0" Height="6.0" InternalLines="true" NullLines="false" ShowTitle="false" CaptionType="NONE" CaptionLinkType="STRAIGHT_LINES" Id="6" Above="true" LineNo="0" LinePos="0.0"><LabelMargin Left="1.0" Top="1.0" Right="1.0" Bottom="1.0"></LabelMargin><DataIds TextColor="#000000" TextStyle="" FontFamily="Arial" DecimalFormat="#0.0#####" LocaleLang="en" LocaleCountry="" LocaleVariant=""><DataId PieColor="#0000FF" PieCaption="">6.0</DataId><DataId PieColor="#FF0000" PieCaption="">6.1</DataId></DataIds></PieChartLabel><InvisibleData Id="6.0" Text="0.999254" IsDecimal="true"></InvisibleData><InvisibleData Id="6.1" Text="7.46E-4" IsDecimal="true"></InvisibleData></Branch><Node Text="internalNode18" IsDecimal="false" UniqueName="s6q9ukyh5s" TextColor="#000000" TextHeight="6.0" TextStyle="" FontFamily="Arial" DecimalFormat="#0.0#####" LocaleLang="en" LocaleCountry="" LocaleVariant="" LineColor="#000000" LineWidth="0.3" EdgeRadius="1.0"><LeafMargin Left="1.0" Top="0.3" Right="1.0" Bottom="0.3"></LeafMargin><Branch Length="0.007755554" LineColor="#000000" LineWidth="0.3" ConstantWidth="false" MinLength="4.0" MinSpaceAbove="0.0" MinSpaceBelow="0.0"><PieChartLabel TextColor="#000000" TextHeight="6.0" TextStyle="" FontFamily="Arial" DecimalFormat="#0.0#####" LocaleLang="en" LocaleCountry="" LocaleVariant="" LineColor="#000000" LineWidth="0.3" Width="6.0" Height="6.0" InternalLines="true" NullLines="false" ShowTitle="false" CaptionType="NONE" CaptionLinkType="STRAIGHT_LINES" Id="6" Above="true" LineNo="0" LinePos="0.0"><LabelMargin Left="1.0" Top="1.0" Right="1.0" Bottom="1.0"></LabelMargin><DataIds TextColor="#000000" TextStyle="" FontFamily="Arial" DecimalFormat="#0.0#####" LocaleLang="en" LocaleCountry="" LocaleVariant=""><DataId PieColor="#0000FF" PieCaption="">6.0</DataId><DataId PieColor="#FF0000" PieCaption="">6.1</DataId></DataIds></PieChartLabel><InvisibleData Id="6.0" Text="1.0" IsDecimal="true"></InvisibleData><InvisibleData Id="6.1" Text="0.0" IsDecimal="true"></InvisibleData></Branch><Node Text="internalNode19" IsDecimal="false" UniqueName="j0liv39dw7" TextColor="#000000" TextHeight="6.0" TextStyle="" FontFamily="Arial" DecimalFormat="#0.0#####" LocaleLang="en" LocaleCountry="" LocaleVariant="" LineColor="#000000" LineWidth="0.3" EdgeRadius="1.0"><LeafMargin Left="1.0" Top="0.3" Right="1.0" Bottom="0.3"></LeafMargin><Branch Length="0.002429392" LineColor="#000000" LineWidth="0.3" ConstantWidth="false" MinLength="4.0" MinSpaceAbove="0.0" MinSpaceBelow="0.0"><PieChartLabel TextColor="#000000" TextHeight="6.0" TextStyle="" FontFamily="Arial" DecimalFormat="#0.0#####" LocaleLang="en" LocaleCountry="" LocaleVariant="" LineColor="#000000" LineWidth="0.3" Width="6.0" Height="6.0" InternalLines="true" NullLines="false" ShowTitle="false" CaptionType="NONE" CaptionLinkType="STRAIGHT_LINES" Id="6" Above="true" LineNo="0" LinePos="0.0"><LabelMargin Left="1.0" Top="1.0" Right="1.0" Bottom="1.0"></LabelMargin><DataIds TextColor="#000000" TextStyle="" FontFamily="Arial" DecimalFormat="#0.0#####" LocaleLang="en" LocaleCountry="" LocaleVariant=""><DataId PieColor="#0000FF" PieCaption="">6.0</DataId><DataId PieColor="#FF0000" PieCaption="">6.1</DataId></DataIds></PieChartLabel><InvisibleData Id="6.0" Text="0.999987" IsDecimal="true"></InvisibleData><InvisibleData Id="6.1" Text="1.3E-5" IsDecimal="true"></InvisibleData></Branch><Node Text="Oxyporus aequicollis PogranFE19 33" IsDecimal="false" UniqueName="6gsk1wcf2m" TextColor="#000000" TextHeight="6.0" TextStyle="" FontFamily="Arial" DecimalFormat="#0.0#####" LocaleLang="en" LocaleCountry="" LocaleVariant="" LineColor="#000000" LineWidth="0.3" EdgeRadius="1.0"><LeafMargin Left="1.0" Top="0.3" Right="1.0" Bottom="0.3"></LeafMargin><Branch Length="0.001060335" LineColor="#000000" LineWidth="0.3" ConstantWidth="false" MinLength="4.0" MinSpaceAbove="0.0" MinSpaceBelow="0.0"></Branch></Node><Node Text="Oxyporus aequicollis small PogranFE19 43" IsDecimal="false" UniqueName="za0tz4qleo" TextColor="#000000" TextHeight="6.0" TextStyle="" FontFamily="Arial" DecimalFormat="#0.0#####" LocaleLang="en" LocaleCountry="" LocaleVariant="" LineColor="#000000" LineWidth="0.3" EdgeRadius="1.0"><LeafMargin Left="1.0" Top="0.3" Right="1.0" Bottom="0.3"></LeafMargin><Branch Length="0.001055718" LineColor="#000000" LineWidth="0.3" ConstantWidth="false" MinLength="4.0" MinSpaceAbove="0.0" MinSpaceBelow="0.0"></Branch></Node><Node Text="Oxyporus germanus PogranFE19 40" IsDecimal="false" UniqueName="6oyymk9pcp" TextColor="#000000" TextHeight="6.0" TextStyle="" FontFamily="Arial" DecimalFormat="#0.0#####" LocaleLang="en" LocaleCountry="" LocaleVariant="" LineColor="#000000" LineWidth="0.3" EdgeRadius="1.0"><LeafMargin Left="1.0" Top="0.3" Right="1.0" Bottom="0.3"></LeafMargin><Branch Length="0.004064341" LineColor="#000000" LineWidth="0.3" ConstantWidth="false" MinLength="4.0" MinSpaceAbove="0.0" MinSpaceBelow="0.0"></Branch></Node></Node><Node Text="Oxyporus basicornis Buryatia19 13" IsDecimal="false" UniqueName="8ffdjx0hzp" TextColor="#000000" TextHeight="6.0" TextStyle="" FontFamily="Arial" DecimalFormat="#0.0#####" LocaleLang="en" LocaleCountry="" LocaleVariant="" LineColor="#000000" LineWidth="0.3" EdgeRadius="1.0"><LeafMargin Left="1.0" Top="0.3" Right="1.0" Bottom="0.3"></LeafMargin><Branch Length="0.001015554" LineColor="#000000" LineWidth="0.3" ConstantWidth="false" MinLength="4.0" MinSpaceAbove="0.0" MinSpaceBelow="0.0"></Branch></Node><Node Text="Oxyporus basicornis GornTaezhFE18 19" IsDecimal="false" UniqueName="4vqxdfxwgy" TextColor="#000000" TextHeight="6.0" TextStyle="" FontFamily="Arial" DecimalFormat="#0.0#####" LocaleLang="en" LocaleCountry="" LocaleVariant="" LineColor="#000000" LineWidth="0.3" EdgeRadius="1.0"><LeafMargin Left="1.0" Top="0.3" Right="1.0" Bottom="0.3"></LeafMargin><Branch Length="0.001021344" LineColor="#000000" LineWidth="0.3" ConstantWidth="false" MinLength="4.0" MinSpaceAbove="0.0" MinSpaceBelow="0.0"></Branch></Node><Node Text="Oxyporus basicornis GornTaezhFE18 38" IsDecimal="false" UniqueName="8kxiiiii7r" TextColor="#000000" TextHeight="6.0" TextStyle="" FontFamily="Arial" DecimalFormat="#0.0#####" LocaleLang="en" LocaleCountry="" LocaleVariant="" LineColor="#000000" LineWidth="0.3" EdgeRadius="1.0"><LeafMargin Left="1.0" Top="0.3" Right="1.0" Bottom="0.3"></LeafMargin><Branch Length="0.001071998" LineColor="#000000" LineWidth="0.3" ConstantWidth="false" MinLength="4.0" MinSpaceAbove="0.0" MinSpaceBelow="0.0"></Branch></Node><Node Text="Oxyporus basicornis PogranFE19 42" IsDecimal="false" UniqueName="5aqotzlq1k" TextColor="#000000" TextHeight="6.0" TextStyle="" FontFamily="Arial" DecimalFormat="#0.0#####" LocaleLang="en" LocaleCountry="" LocaleVariant="" LineColor="#000000" LineWidth="0.3" EdgeRadius="1.0"><LeafMargin Left="1.0" Top="0.3" Right="1.0" Bottom="0.3"></LeafMargin><Branch Length="0.001042375" LineColor="#000000" LineWidth="0.3" ConstantWidth="false" MinLength="4.0" MinSpaceAbove="0.0" MinSpaceBelow="0.0"></Branch></Node><Node Text="Oxyporus basicornis PogranFE19 50" IsDecimal="false" UniqueName="7231srhwg3" TextColor="#000000" TextHeight="6.0" TextStyle="" FontFamily="Arial" DecimalFormat="#0.0#####" LocaleLang="en" LocaleCountry="" LocaleVariant="" LineColor="#000000" LineWidth="0.3" EdgeRadius="1.0"><LeafMargin Left="1.0" Top="0.3" Right="1.0" Bottom="0.3"></LeafMargin><Branch Length="0.001104173" LineColor="#000000" LineWidth="0.3" ConstantWidth="false" MinLength="4.0" MinSpaceAbove="0.0" MinSpaceBelow="0.0"></Branch></Node></Node><Node Text="internalNode20" IsDecimal="false" UniqueName="fx8wkspnpb" TextColor="#000000" TextHeight="6.0" TextStyle="" FontFamily="Arial" DecimalFormat="#0.0#####" LocaleLang="en" LocaleCountry="" LocaleVariant="" LineColor="#000000" LineWidth="0.3" EdgeRadius="1.0"><LeafMargin Left="1.0" Top="0.3" Right="1.0" Bottom="0.3"></LeafMargin><Branch Length="0.008685141" LineColor="#000000" LineWidth="0.3" ConstantWidth="false" MinLength="4.0" MinSpaceAbove="0.0" MinSpaceBelow="0.0"><PieChartLabel TextColor="#000000" TextHeight="6.0" TextStyle="" FontFamily="Arial" DecimalFormat="#0.0#####" LocaleLang="en" LocaleCountry="" LocaleVariant="" LineColor="#000000" LineWidth="0.3" Width="6.0" Height="6.0" InternalLines="true" NullLines="false" ShowTitle="false" CaptionType="NONE" CaptionLinkType="STRAIGHT_LINES" Id="6" Above="true" LineNo="0" LinePos="0.0"><LabelMargin Left="1.0" Top="1.0" Right="1.0" Bottom="1.0"></LabelMargin><DataIds TextColor="#000000" TextStyle="" FontFamily="Arial" DecimalFormat="#0.0#####" LocaleLang="en" LocaleCountry="" LocaleVariant=""><DataId PieColor="#0000FF" PieCaption="">6.0</DataId><DataId PieColor="#FF0000" PieCaption="">6.1</DataId></DataIds></PieChartLabel><InvisibleData Id="6.0" Text="0.997727" IsDecimal="true"></InvisibleData><InvisibleData Id="6.1" Text="0.002273" IsDecimal="true"></InvisibleData></Branch><Node Text="internalNode21" IsDecimal="false" UniqueName="fawlj4ot12" TextColor="#000000" TextHeight="6.0" TextStyle="" FontFamily="Arial" DecimalFormat="#0.0#####" LocaleLang="en" LocaleCountry="" LocaleVariant="" LineColor="#000000" LineWidth="0.3" EdgeRadius="1.0"><LeafMargin Left="1.0" Top="0.3" Right="1.0" Bottom="0.3"></LeafMargin><Branch Length="0.003971854" LineColor="#000000" LineWidth="0.3" ConstantWidth="false" MinLength="4.0" MinSpaceAbove="0.0" MinSpaceBelow="0.0"><PieChartLabel TextColor="#000000" TextHeight="6.0" TextStyle="" FontFamily="Arial" DecimalFormat="#0.0#####" LocaleLang="en" LocaleCountry="" LocaleVariant="" LineColor="#000000" LineWidth="0.3" Width="6.0" Height="6.0" InternalLines="true" NullLines="false" ShowTitle="false" CaptionType="NONE" CaptionLinkType="STRAIGHT_LINES" Id="6" Above="true" LineNo="0" LinePos="0.0"><LabelMargin Left="1.0" Top="1.0" Right="1.0" Bottom="1.0"></LabelMargin><DataIds TextColor="#000000" TextStyle="" FontFamily="Arial" DecimalFormat="#0.0#####" LocaleLang="en" LocaleCountry="" LocaleVariant=""><DataId PieColor="#0000FF" PieCaption="">6.0</DataId><DataId PieColor="#FF0000" PieCaption="">6.1</DataId></DataIds></PieChartLabel><InvisibleData Id="6.0" Text="1.0" IsDecimal="true"></InvisibleData><InvisibleData Id="6.1" Text="0.0" IsDecimal="true"></InvisibleData></Branch><Node Text="internalNode22" IsDecimal="false" UniqueName="nbi107cjph" TextColor="#000000" TextHeight="6.0" TextStyle="" FontFamily="Arial" DecimalFormat="#0.0#####" LocaleLang="en" LocaleCountry="" LocaleVariant="" LineColor="#000000" LineWidth="0.3" EdgeRadius="1.0"><LeafMargin Left="1.0" Top="0.3" Right="1.0" Bottom="0.3"></LeafMargin><Branch Length="0.003874716" LineColor="#000000" LineWidth="0.3" ConstantWidth="false" MinLength="4.0" MinSpaceAbove="0.0" MinSpaceBelow="0.0"><PieChartLabel TextColor="#000000" TextHeight="6.0" TextStyle="" FontFamily="Arial" DecimalFormat="#0.0#####" LocaleLang="en" LocaleCountry="" LocaleVariant="" LineColor="#000000" LineWidth="0.3" Width="6.0" Height="6.0" InternalLines="true" NullLines="false" ShowTitle="false" CaptionType="NONE" CaptionLinkType="STRAIGHT_LINES" Id="6" Above="true" LineNo="0" LinePos="0.0"><LabelMargin Left="1.0" Top="1.0" Right="1.0" Bottom="1.0"></LabelMargin><DataIds TextColor="#000000" TextStyle="" FontFamily="Arial" DecimalFormat="#0.0#####" LocaleLang="en" LocaleCountry="" LocaleVariant=""><DataId PieColor="#0000FF" PieCaption="">6.0</DataId><DataId PieColor="#FF0000" PieCaption="">6.1</DataId></DataIds></PieChartLabel><InvisibleData Id="6.0" Text="0.999075" IsDecimal="true"></InvisibleData><InvisibleData Id="6.1" Text="9.25E-4" IsDecimal="true"></InvisibleData></Branch><Node Text="Oxyporus basicornis PosietFE19 39" IsDecimal="false" UniqueName="450b6vv01w" TextColor="#000000" TextHeight="6.0" TextStyle="" FontFamily="Arial" DecimalFormat="#0.0#####" LocaleLang="en" LocaleCountry="" LocaleVariant="" LineColor="#000000" LineWidth="0.3" EdgeRadius="1.0"><LeafMargin Left="1.0" Top="0.3" Right="1.0" Bottom="0.3"></LeafMargin><Branch Length="0.001308245" LineColor="#000000" LineWidth="0.3" ConstantWidth="false" MinLength="4.0" MinSpaceAbove="0.0" MinSpaceBelow="0.0"></Branch></Node><Node Text="Oxyporus germanus PosietFE19 11" IsDecimal="false" UniqueName="ccg4jeiqgb" TextColor="#000000" TextHeight="6.0" TextStyle="" FontFamily="Arial" DecimalFormat="#0.0#####" LocaleLang="en" LocaleCountry="" LocaleVariant="" LineColor="#000000" LineWidth="0.3" EdgeRadius="1.0"><LeafMargin Left="1.0" Top="0.3" Right="1.0" Bottom="0.3"></LeafMargin><Branch Length="0.003542844" LineColor="#000000" LineWidth="0.3" ConstantWidth="false" MinLength="4.0" MinSpaceAbove="0.0" MinSpaceBelow="0.0"></Branch></Node></Node><Node Text="internalNode23" IsDecimal="false" UniqueName="f0zg5fvhr8" TextColor="#000000" TextHeight="6.0" TextStyle="" FontFamily="Arial" DecimalFormat="#0.0#####" LocaleLang="en" LocaleCountry="" LocaleVariant="" LineColor="#000000" LineWidth="0.3" EdgeRadius="1.0"><LeafMargin Left="1.0" Top="0.3" Right="1.0" Bottom="0.3"></LeafMargin><Branch Length="0.005949093" LineColor="#000000" LineWidth="0.3" ConstantWidth="false" MinLength="4.0" MinSpaceAbove="0.0" MinSpaceBelow="0.0"><PieChartLabel TextColor="#000000" TextHeight="6.0" TextStyle="" FontFamily="Arial" DecimalFormat="#0.0#####" LocaleLang="en" LocaleCountry="" LocaleVariant="" LineColor="#000000" LineWidth="0.3" Width="6.0" Height="6.0" InternalLines="true" NullLines="false" ShowTitle="false" CaptionType="NONE" CaptionLinkType="STRAIGHT_LINES" Id="6" Above="true" LineNo="0" LinePos="0.0"><LabelMargin Left="1.0" Top="1.0" Right="1.0" Bottom="1.0"></LabelMargin><DataIds TextColor="#000000" TextStyle="" FontFamily="Arial" DecimalFormat="#0.0#####" LocaleLang="en" LocaleCountry="" LocaleVariant=""><DataId PieColor="#0000FF" PieCaption="">6.0</DataId><DataId PieColor="#FF0000" PieCaption="">6.1</DataId></DataIds></PieChartLabel><InvisibleData Id="6.0" Text="0.999357" IsDecimal="true"></InvisibleData><InvisibleData Id="6.1" Text="6.43E-4" IsDecimal="true"></InvisibleData></Branch><Node Text="internalNode24" IsDecimal="false" UniqueName="4ilpzxczid" TextColor="#000000" TextHeight="6.0" TextStyle="" FontFamily="Arial" DecimalFormat="#0.0#####" LocaleLang="en" LocaleCountry="" LocaleVariant="" LineColor="#000000" LineWidth="0.3" EdgeRadius="1.0"><LeafMargin Left="1.0" Top="0.3" Right="1.0" Bottom="0.3"></LeafMargin><Branch Length="0.002467292" LineColor="#000000" LineWidth="0.3" ConstantWidth="false" MinLength="4.0" MinSpaceAbove="0.0" MinSpaceBelow="0.0"><PieChartLabel TextColor="#000000" TextHeight="6.0" TextStyle="" FontFamily="Arial" DecimalFormat="#0.0#####" LocaleLang="en" LocaleCountry="" LocaleVariant="" LineColor="#000000" LineWidth="0.3" Width="6.0" Height="6.0" InternalLines="true" NullLines="false" ShowTitle="false" CaptionType="NONE" CaptionLinkType="STRAIGHT_LINES" Id="6" Above="true" LineNo="0" LinePos="0.0"><LabelMargin Left="1.0" Top="1.0" Right="1.0" Bottom="1.0"></LabelMargin><DataIds TextColor="#000000" TextStyle="" FontFamily="Arial" DecimalFormat="#0.0#####" LocaleLang="en" LocaleCountry="" LocaleVariant=""><DataId PieColor="#0000FF" PieCaption="">6.0</DataId><DataId PieColor="#FF0000" PieCaption="">6.1</DataId></DataIds></PieChartLabel><InvisibleData Id="6.0" Text="0.998643" IsDecimal="true"></InvisibleData><InvisibleData Id="6.1" Text="0.001357" IsDecimal="true"></InvisibleData></Branch><Node Text="Oxyporus parvus1 CNUIC588" IsDecimal="false" UniqueName="vj3hla2yd3" TextColor="#000000" TextHeight="6.0" TextStyle="" FontFamily="Arial" DecimalFormat="#0.0#####" LocaleLang="en" LocaleCountry="" LocaleVariant="" LineColor="#000000" LineWidth="0.3" EdgeRadius="1.0"><LeafMargin Left="1.0" Top="0.3" Right="1.0" Bottom="0.3"></LeafMargin><Branch Length="0.00248024" LineColor="#000000" LineWidth="0.3" ConstantWidth="false" MinLength="4.0" MinSpaceAbove="0.0" MinSpaceBelow="0.0"></Branch></Node><Node Text="Oxyporus parvus2 CNUIC601" IsDecimal="false" UniqueName="qt7yi8m5hx" TextColor="#000000" TextHeight="6.0" TextStyle="" FontFamily="Arial" DecimalFormat="#0.0#####" LocaleLang="en" LocaleCountry="" LocaleVariant="" LineColor="#000000" LineWidth="0.3" EdgeRadius="1.0"><LeafMargin Left="1.0" Top="0.3" Right="1.0" Bottom="0.3"></LeafMargin><Branch Length="0.002749748" LineColor="#000000" LineWidth="0.3" ConstantWidth="false" MinLength="4.0" MinSpaceAbove="0.0" MinSpaceBelow="0.0"></Branch></Node></Node><Node Text="Oxyporus parvus5 CNUIC604" IsDecimal="false" UniqueName="21h0ic94fy" TextColor="#000000" TextHeight="6.0" TextStyle="" FontFamily="Arial" DecimalFormat="#0.0#####" LocaleLang="en" LocaleCountry="" LocaleVariant="" LineColor="#000000" LineWidth="0.3" EdgeRadius="1.0"><LeafMargin Left="1.0" Top="0.3" Right="1.0" Bottom="0.3"></LeafMargin><Branch Length="0.001248784" LineColor="#000000" LineWidth="0.3" ConstantWidth="false" MinLength="4.0" MinSpaceAbove="0.0" MinSpaceBelow="0.0"></Branch></Node></Node><Node Text="Oxyporus parvus4 CNUIC603" IsDecimal="false" UniqueName="0pi12n336b" TextColor="#000000" TextHeight="6.0" TextStyle="" FontFamily="Arial" DecimalFormat="#0.0#####" LocaleLang="en" LocaleCountry="" LocaleVariant="" LineColor="#000000" LineWidth="0.3" EdgeRadius="1.0"><LeafMargin Left="1.0" Top="0.3" Right="1.0" Bottom="0.3"></LeafMargin><Branch Length="0.001062062" LineColor="#000000" LineWidth="0.3" ConstantWidth="false" MinLength="4.0" MinSpaceAbove="0.0" MinSpaceBelow="0.0"></Branch></Node><Node Text="Oxyporus parvus7 CNUIC606" IsDecimal="false" UniqueName="4nhp592gc0" TextColor="#000000" TextHeight="6.0" TextStyle="" FontFamily="Arial" DecimalFormat="#0.0#####" LocaleLang="en" LocaleCountry="" LocaleVariant="" LineColor="#000000" LineWidth="0.3" EdgeRadius="1.0"><LeafMargin Left="1.0" Top="0.3" Right="1.0" Bottom="0.3"></LeafMargin><Branch Length="0.0060031" LineColor="#000000" LineWidth="0.3" ConstantWidth="false" MinLength="4.0" MinSpaceAbove="0.0" MinSpaceBelow="0.0"></Branch></Node><Node Text="Oxyporus parvus8 CNUIC632" IsDecimal="false" UniqueName="ljtyoqe0us" TextColor="#000000" TextHeight="6.0" TextStyle="" FontFamily="Arial" DecimalFormat="#0.0#####" LocaleLang="en" LocaleCountry="" LocaleVariant="" LineColor="#000000" LineWidth="0.3" EdgeRadius="1.0"><LeafMargin Left="1.0" Top="0.3" Right="1.0" Bottom="0.3"></LeafMargin><Branch Length="0.002590715" LineColor="#000000" LineWidth="0.3" ConstantWidth="false" MinLength="4.0" MinSpaceAbove="0.0" MinSpaceBelow="0.0"></Branch></Node></Node><Node Text="Oxyporus parvus6 CNUIC605" IsDecimal="false" UniqueName="tztuig7jnv" TextColor="#000000" TextHeight="6.0" TextStyle="" FontFamily="Arial" DecimalFormat="#0.0#####" LocaleLang="en" LocaleCountry="" LocaleVariant="" LineColor="#000000" LineWidth="0.3" EdgeRadius="1.0"><LeafMargin Left="1.0" Top="0.3" Right="1.0" Bottom="0.3"></LeafMargin><Branch Length="0.002910179" LineColor="#000000" LineWidth="0.3" ConstantWidth="false" MinLength="4.0" MinSpaceAbove="0.0" MinSpaceBelow="0.0"></Branch></Node></Node><Node Text="internalNode25" IsDecimal="false" UniqueName="81n5u68320" TextColor="#000000" TextHeight="6.0" TextStyle="" FontFamily="Arial" DecimalFormat="#0.0#####" LocaleLang="en" LocaleCountry="" LocaleVariant="" LineColor="#000000" LineWidth="0.3" EdgeRadius="1.0"><LeafMargin Left="1.0" Top="0.3" Right="1.0" Bottom="0.3"></LeafMargin><Branch Length="0.004202501" LineColor="#000000" LineWidth="0.3" ConstantWidth="false" MinLength="4.0" MinSpaceAbove="0.0" MinSpaceBelow="0.0"><PieChartLabel TextColor="#000000" TextHeight="6.0" TextStyle="" FontFamily="Arial" DecimalFormat="#0.0#####" LocaleLang="en" LocaleCountry="" LocaleVariant="" LineColor="#000000" LineWidth="0.3" Width="6.0" Height="6.0" InternalLines="true" NullLines="false" ShowTitle="false" CaptionType="NONE" CaptionLinkType="STRAIGHT_LINES" Id="6" Above="true" LineNo="0" LinePos="0.0"><LabelMargin Left="1.0" Top="1.0" Right="1.0" Bottom="1.0"></LabelMargin><DataIds TextColor="#000000" TextStyle="" FontFamily="Arial" DecimalFormat="#0.0#####" LocaleLang="en" LocaleCountry="" LocaleVariant=""><DataId PieColor="#0000FF" PieCaption="">6.0</DataId><DataId PieColor="#FF0000" PieCaption="">6.1</DataId></DataIds></PieChartLabel><InvisibleData Id="6.0" Text="0.999769" IsDecimal="true"></InvisibleData><InvisibleData Id="6.1" Text="2.31E-4" IsDecimal="true"></InvisibleData></Branch><Node Text="Oxyporus parvus10 CNUIC639" IsDecimal="false" UniqueName="n8qoee5e0g" TextColor="#000000" TextHeight="6.0" TextStyle="" FontFamily="Arial" DecimalFormat="#0.0#####" LocaleLang="en" LocaleCountry="" LocaleVariant="" LineColor="#000000" LineWidth="0.3" EdgeRadius="1.0"><LeafMargin Left="1.0" Top="0.3" Right="1.0" Bottom="0.3"></LeafMargin><Branch Length="0.001059266" LineColor="#000000" LineWidth="0.3" ConstantWidth="false" MinLength="4.0" MinSpaceAbove="0.0" MinSpaceBelow="0.0"></Branch></Node><Node Text="Oxyporus parvus3 CNUIC602" IsDecimal="false" UniqueName="3ksage0rrk" TextColor="#000000" TextHeight="6.0" TextStyle="" FontFamily="Arial" DecimalFormat="#0.0#####" LocaleLang="en" LocaleCountry="" LocaleVariant="" LineColor="#000000" LineWidth="0.3" EdgeRadius="1.0"><LeafMargin Left="1.0" Top="0.3" Right="1.0" Bottom="0.3"></LeafMargin><Branch Length="0.00107293" LineColor="#000000" LineWidth="0.3" ConstantWidth="false" MinLength="4.0" MinSpaceAbove="0.0" MinSpaceBelow="0.0"></Branch></Node></Node></Node><Node Text="internalNode26" IsDecimal="false" UniqueName="ajexodpvnl" TextColor="#000000" TextHeight="6.0" TextStyle="" FontFamily="Arial" DecimalFormat="#0.0#####" LocaleLang="en" LocaleCountry="" LocaleVariant="" LineColor="#000000" LineWidth="0.3" EdgeRadius="1.0"><LeafMargin Left="1.0" Top="0.3" Right="1.0" Bottom="0.3"></LeafMargin><Branch Length="0.01567575" LineColor="#000000" LineWidth="0.3" ConstantWidth="false" MinLength="4.0" MinSpaceAbove="0.0" MinSpaceBelow="0.0"><PieChartLabel TextColor="#000000" TextHeight="6.0" TextStyle="" FontFamily="Arial" DecimalFormat="#0.0#####" LocaleLang="en" LocaleCountry="" LocaleVariant="" LineColor="#000000" LineWidth="0.3" Width="6.0" Height="6.0" InternalLines="true" NullLines="false" ShowTitle="false" CaptionType="NONE" CaptionLinkType="STRAIGHT_LINES" Id="6" Above="true" LineNo="0" LinePos="0.0"><LabelMargin Left="1.0" Top="1.0" Right="1.0" Bottom="1.0"></LabelMargin><DataIds TextColor="#000000" TextStyle="" FontFamily="Arial" DecimalFormat="#0.0#####" LocaleLang="en" LocaleCountry="" LocaleVariant=""><DataId PieColor="#0000FF" PieCaption="">6.0</DataId><DataId PieColor="#FF0000" PieCaption="">6.1</DataId></DataIds></PieChartLabel><InvisibleData Id="6.0" Text="0.892583" IsDecimal="true"></InvisibleData><InvisibleData Id="6.1" Text="0.107417" IsDecimal="true"></InvisibleData></Branch><Node Text="internalNode27" IsDecimal="false" UniqueName="ygytbo65ob" TextColor="#000000" TextHeight="6.0" TextStyle="" FontFamily="Arial" DecimalFormat="#0.0#####" LocaleLang="en" LocaleCountry="" LocaleVariant="" LineColor="#000000" LineWidth="0.3" EdgeRadius="1.0"><LeafMargin Left="1.0" Top="0.3" Right="1.0" Bottom="0.3"></LeafMargin><Branch Length="0.0132556" LineColor="#000000" LineWidth="0.3" ConstantWidth="false" MinLength="4.0" MinSpaceAbove="0.0" MinSpaceBelow="0.0"><PieChartLabel TextColor="#000000" TextHeight="6.0" TextStyle="" FontFamily="Arial" DecimalFormat="#0.0#####" LocaleLang="en" LocaleCountry="" LocaleVariant="" LineColor="#000000" LineWidth="0.3" Width="6.0" Height="6.0" InternalLines="true" NullLines="false" ShowTitle="false" CaptionType="NONE" CaptionLinkType="STRAIGHT_LINES" Id="6" Above="true" LineNo="0" LinePos="0.0"><LabelMargin Left="1.0" Top="1.0" Right="1.0" Bottom="1.0"></LabelMargin><DataIds TextColor="#000000" TextStyle="" FontFamily="Arial" DecimalFormat="#0.0#####" LocaleLang="en" LocaleCountry="" LocaleVariant=""><DataId PieColor="#0000FF" PieCaption="">6.0</DataId><DataId PieColor="#FF0000" PieCaption="">6.1</DataId></DataIds></PieChartLabel><InvisibleData Id="6.0" Text="0.939476" IsDecimal="true"></InvisibleData><InvisibleData Id="6.1" Text="0.060524" IsDecimal="true"></InvisibleData></Branch><Node Text="internalNode28" IsDecimal="false" UniqueName="tz36hrafti" TextColor="#000000" TextHeight="6.0" TextStyle="" FontFamily="Arial" DecimalFormat="#0.0#####" LocaleLang="en" LocaleCountry="" LocaleVariant="" LineColor="#000000" LineWidth="0.3" EdgeRadius="1.0"><LeafMargin Left="1.0" Top="0.3" Right="1.0" Bottom="0.3"></LeafMargin><Branch Length="0.01488225" LineColor="#000000" LineWidth="0.3" ConstantWidth="false" MinLength="4.0" MinSpaceAbove="0.0" MinSpaceBelow="0.0"><PieChartLabel TextColor="#000000" TextHeight="6.0" TextStyle="" FontFamily="Arial" DecimalFormat="#0.0#####" LocaleLang="en" LocaleCountry="" LocaleVariant="" LineColor="#000000" LineWidth="0.3" Width="6.0" Height="6.0" InternalLines="true" NullLines="false" ShowTitle="false" CaptionType="NONE" CaptionLinkType="STRAIGHT_LINES" Id="6" Above="true" LineNo="0" LinePos="0.0"><LabelMargin Left="1.0" Top="1.0" Right="1.0" Bottom="1.0"></LabelMargin><DataIds TextColor="#000000" TextStyle="" FontFamily="Arial" DecimalFormat="#0.0#####" LocaleLang="en" LocaleCountry="" LocaleVariant=""><DataId PieColor="#0000FF" PieCaption="">6.0</DataId><DataId PieColor="#FF0000" PieCaption="">6.1</DataId></DataIds></PieChartLabel><InvisibleData Id="6.0" Text="0.999999" IsDecimal="true"></InvisibleData><InvisibleData Id="6.1" Text="1.0E-6" IsDecimal="true"></InvisibleData></Branch><Node Text="internalNode29" IsDecimal="false" UniqueName="35709bv43y" TextColor="#000000" TextHeight="6.0" TextStyle="" FontFamily="Arial" DecimalFormat="#0.0#####" LocaleLang="en" LocaleCountry="" LocaleVariant="" LineColor="#000000" LineWidth="0.3" EdgeRadius="1.0"><LeafMargin Left="1.0" Top="0.3" Right="1.0" Bottom="0.3"></LeafMargin><Branch Length="0.002466102" LineColor="#000000" LineWidth="0.3" ConstantWidth="false" MinLength="4.0" MinSpaceAbove="0.0" MinSpaceBelow="0.0"><PieChartLabel TextColor="#000000" TextHeight="6.0" TextStyle="" FontFamily="Arial" DecimalFormat="#0.0#####" LocaleLang="en" LocaleCountry="" LocaleVariant="" LineColor="#000000" LineWidth="0.3" Width="6.0" Height="6.0" InternalLines="true" NullLines="false" ShowTitle="false" CaptionType="NONE" CaptionLinkType="STRAIGHT_LINES" Id="6" Above="true" LineNo="0" LinePos="0.0"><LabelMargin Left="1.0" Top="1.0" Right="1.0" Bottom="1.0"></LabelMargin><DataIds TextColor="#000000" TextStyle="" FontFamily="Arial" DecimalFormat="#0.0#####" LocaleLang="en" LocaleCountry="" LocaleVariant=""><DataId PieColor="#0000FF" PieCaption="">6.0</DataId><DataId PieColor="#FF0000" PieCaption="">6.1</DataId></DataIds></PieChartLabel><InvisibleData Id="6.0" Text="1.0" IsDecimal="true"></InvisibleData><InvisibleData Id="6.1" Text="0.0" IsDecimal="true"></InvisibleData></Branch><Node Text="internalNode30" IsDecimal="false" UniqueName="475l8gck3e" TextColor="#000000" TextHeight="6.0" TextStyle="" FontFamily="Arial" DecimalFormat="#0.0#####" LocaleLang="en" LocaleCountry="" LocaleVariant="" LineColor="#000000" LineWidth="0.3" EdgeRadius="1.0"><LeafMargin Left="1.0" Top="0.3" Right="1.0" Bottom="0.3"></LeafMargin><Branch Length="0.003365055" LineColor="#000000" LineWidth="0.3" ConstantWidth="false" MinLength="4.0" MinSpaceAbove="0.0" MinSpaceBelow="0.0"><PieChartLabel TextColor="#000000" TextHeight="6.0" TextStyle="" FontFamily="Arial" DecimalFormat="#0.0#####" LocaleLang="en" LocaleCountry="" LocaleVariant="" LineColor="#000000" LineWidth="0.3" Width="6.0" Height="6.0" InternalLines="true" NullLines="false" ShowTitle="false" CaptionType="NONE" CaptionLinkType="STRAIGHT_LINES" Id="6" Above="true" LineNo="0" LinePos="0.0"><LabelMargin Left="1.0" Top="1.0" Right="1.0" Bottom="1.0"></LabelMargin><DataIds TextColor="#000000" TextStyle="" FontFamily="Arial" DecimalFormat="#0.0#####" LocaleLang="en" LocaleCountry="" LocaleVariant=""><DataId PieColor="#0000FF" PieCaption="">6.0</DataId><DataId PieColor="#FF0000" PieCaption="">6.1</DataId></DataIds></PieChartLabel><InvisibleData Id="6.0" Text="0.998071" IsDecimal="true"></InvisibleData><InvisibleData Id="6.1" Text="0.001929" IsDecimal="true"></InvisibleData></Branch><Node Text="internalNode31" IsDecimal="false" UniqueName="m0plh1kzov" TextColor="#000000" TextHeight="6.0" TextStyle="" FontFamily="Arial" DecimalFormat="#0.0#####" LocaleLang="en" LocaleCountry="" LocaleVariant="" LineColor="#000000" LineWidth="0.3" EdgeRadius="1.0"><LeafMargin Left="1.0" Top="0.3" Right="1.0" Bottom="0.3"></LeafMargin><Branch Length="0.004087485" LineColor="#000000" LineWidth="0.3" ConstantWidth="false" MinLength="4.0" MinSpaceAbove="0.0" MinSpaceBelow="0.0"><PieChartLabel TextColor="#000000" TextHeight="6.0" TextStyle="" FontFamily="Arial" DecimalFormat="#0.0#####" LocaleLang="en" LocaleCountry="" LocaleVariant="" LineColor="#000000" LineWidth="0.3" Width="6.0" Height="6.0" InternalLines="true" NullLines="false" ShowTitle="false" CaptionType="NONE" CaptionLinkType="STRAIGHT_LINES" Id="6" Above="true" LineNo="0" LinePos="0.0"><LabelMargin Left="1.0" Top="1.0" Right="1.0" Bottom="1.0"></LabelMargin><DataIds TextColor="#000000" TextStyle="" FontFamily="Arial" DecimalFormat="#0.0#####" LocaleLang="en" LocaleCountry="" LocaleVariant=""><DataId PieColor="#0000FF" PieCaption="">6.0</DataId><DataId PieColor="#FF0000" PieCaption="">6.1</DataId></DataIds></PieChartLabel><InvisibleData Id="6.0" Text="0.999477" IsDecimal="true"></InvisibleData><InvisibleData Id="6.1" Text="5.23E-4" IsDecimal="true"></InvisibleData></Branch><Node Text="Oxyporus aokii AnisimFE19 21" IsDecimal="false" UniqueName="xnm3v16g6a" TextColor="#000000" TextHeight="6.0" TextStyle="" FontFamily="Arial" DecimalFormat="#0.0#####" LocaleLang="en" LocaleCountry="" LocaleVariant="" LineColor="#000000" LineWidth="0.3" EdgeRadius="1.0"><LeafMargin Left="1.0" Top="0.3" Right="1.0" Bottom="0.3"></LeafMargin><Branch Length="0.001037892" LineColor="#000000" LineWidth="0.3" ConstantWidth="false" MinLength="4.0" MinSpaceAbove="0.0" MinSpaceBelow="0.0"></Branch></Node><Node Text="Oxyporus aokii GornTaezhFE18 04" IsDecimal="false" UniqueName="7eb7r0leve" TextColor="#000000" TextHeight="6.0" TextStyle="" FontFamily="Arial" DecimalFormat="#0.0#####" LocaleLang="en" LocaleCountry="" LocaleVariant="" LineColor="#000000" LineWidth="0.3" EdgeRadius="1.0"><LeafMargin Left="1.0" Top="0.3" Right="1.0" Bottom="0.3"></LeafMargin><Branch Length="0.002503332" LineColor="#000000" LineWidth="0.3" ConstantWidth="false" MinLength="4.0" MinSpaceAbove="0.0" MinSpaceBelow="0.0"></Branch></Node></Node><Node Text="Oxyporus basiventris GornTaezhFE18 01" IsDecimal="false" UniqueName="qg255kcakg" TextColor="#000000" TextHeight="6.0" TextStyle="" FontFamily="Arial" DecimalFormat="#0.0#####" LocaleLang="en" LocaleCountry="" LocaleVariant="" LineColor="#000000" LineWidth="0.3" EdgeRadius="1.0"><LeafMargin Left="1.0" Top="0.3" Right="1.0" Bottom="0.3"></LeafMargin><Branch Length="0.002371015" LineColor="#000000" LineWidth="0.3" ConstantWidth="false" MinLength="4.0" MinSpaceAbove="0.0" MinSpaceBelow="0.0"></Branch></Node></Node><Node Text="internalNode32" IsDecimal="false" UniqueName="nggv0ev7ix" TextColor="#000000" TextHeight="6.0" TextStyle="" FontFamily="Arial" DecimalFormat="#0.0#####" LocaleLang="en" LocaleCountry="" LocaleVariant="" LineColor="#000000" LineWidth="0.3" EdgeRadius="1.0"><LeafMargin Left="1.0" Top="0.3" Right="1.0" Bottom="0.3"></LeafMargin><Branch Length="0.007527675" LineColor="#000000" LineWidth="0.3" ConstantWidth="false" MinLength="4.0" MinSpaceAbove="0.0" MinSpaceBelow="0.0"><PieChartLabel TextColor="#000000" TextHeight="6.0" TextStyle="" FontFamily="Arial" DecimalFormat="#0.0#####" LocaleLang="en" LocaleCountry="" LocaleVariant="" LineColor="#000000" LineWidth="0.3" Width="6.0" Height="6.0" InternalLines="true" NullLines="false" ShowTitle="false" CaptionType="NONE" CaptionLinkType="STRAIGHT_LINES" Id="6" Above="true" LineNo="0" LinePos="0.0"><LabelMargin Left="1.0" Top="1.0" Right="1.0" Bottom="1.0"></LabelMargin><DataIds TextColor="#000000" TextStyle="" FontFamily="Arial" DecimalFormat="#0.0#####" LocaleLang="en" LocaleCountry="" LocaleVariant=""><DataId PieColor="#0000FF" PieCaption="">6.0</DataId><DataId PieColor="#FF0000" PieCaption="">6.1</DataId></DataIds></PieChartLabel><InvisibleData Id="6.0" Text="0.996843" IsDecimal="true"></InvisibleData><InvisibleData Id="6.1" Text="0.003157" IsDecimal="true"></InvisibleData></Branch><Node Text="Oxyporus basiventris Kunashir 19 173" IsDecimal="false" UniqueName="hi0lxp2eir" TextColor="#000000" TextHeight="6.0" TextStyle="" FontFamily="Arial" DecimalFormat="#0.0#####" LocaleLang="en" LocaleCountry="" LocaleVariant="" LineColor="#000000" LineWidth="0.3" EdgeRadius="1.0"><LeafMargin Left="1.0" Top="0.3" Right="1.0" Bottom="0.3"></LeafMargin><Branch Length="0.002324215" LineColor="#000000" LineWidth="0.3" ConstantWidth="false" MinLength="4.0" MinSpaceAbove="0.0" MinSpaceBelow="0.0"></Branch></Node><Node Text="Oxyporus basiventris Kunashir 19 174" IsDecimal="false" UniqueName="xe84d10rfx" TextColor="#000000" TextHeight="6.0" TextStyle="" FontFamily="Arial" DecimalFormat="#0.0#####" LocaleLang="en" LocaleCountry="" LocaleVariant="" LineColor="#000000" LineWidth="0.3" EdgeRadius="1.0"><LeafMargin Left="1.0" Top="0.3" Right="1.0" Bottom="0.3"></LeafMargin><Branch Length="0.007028374" LineColor="#000000" LineWidth="0.3" ConstantWidth="false" MinLength="4.0" MinSpaceAbove="0.0" MinSpaceBelow="0.0"></Branch></Node></Node><Node Text="internalNode33" IsDecimal="false" UniqueName="67ztvmt60c" TextColor="#000000" TextHeight="6.0" TextStyle="" FontFamily="Arial" DecimalFormat="#0.0#####" LocaleLang="en" LocaleCountry="" LocaleVariant="" LineColor="#000000" LineWidth="0.3" EdgeRadius="1.0"><LeafMargin Left="1.0" Top="0.3" Right="1.0" Bottom="0.3"></LeafMargin><Branch Length="0.004151708" LineColor="#000000" LineWidth="0.3" ConstantWidth="false" MinLength="4.0" MinSpaceAbove="0.0" MinSpaceBelow="0.0"><PieChartLabel TextColor="#000000" TextHeight="6.0" TextStyle="" FontFamily="Arial" DecimalFormat="#0.0#####" LocaleLang="en" LocaleCountry="" LocaleVariant="" LineColor="#000000" LineWidth="0.3" Width="6.0" Height="6.0" InternalLines="true" NullLines="false" ShowTitle="false" CaptionType="NONE" CaptionLinkType="STRAIGHT_LINES" Id="6" Above="true" LineNo="0" LinePos="0.0"><LabelMargin Left="1.0" Top="1.0" Right="1.0" Bottom="1.0"></LabelMargin><DataIds TextColor="#000000" TextStyle="" FontFamily="Arial" DecimalFormat="#0.0#####" LocaleLang="en" LocaleCountry="" LocaleVariant=""><DataId PieColor="#0000FF" PieCaption="">6.0</DataId><DataId PieColor="#FF0000" PieCaption="">6.1</DataId></DataIds></PieChartLabel><InvisibleData Id="6.0" Text="0.996724" IsDecimal="true"></InvisibleData><InvisibleData Id="6.1" Text="0.003276" IsDecimal="true"></InvisibleData></Branch><Node Text="Oxyporus basiventris PogranFE19 20" IsDecimal="false" UniqueName="rrns9zcru0" TextColor="#000000" TextHeight="6.0" TextStyle="" FontFamily="Arial" DecimalFormat="#0.0#####" LocaleLang="en" LocaleCountry="" LocaleVariant="" LineColor="#000000" LineWidth="0.3" EdgeRadius="1.0"><LeafMargin Left="1.0" Top="0.3" Right="1.0" Bottom="0.3"></LeafMargin><Branch Length="0.003857879" LineColor="#000000" LineWidth="0.3" ConstantWidth="false" MinLength="4.0" MinSpaceAbove="0.0" MinSpaceBelow="0.0"></Branch></Node><Node Text="Oxyporus maxillosus Pogran19 02" IsDecimal="false" UniqueName="p6slos6zhz" TextColor="#000000" TextHeight="6.0" TextStyle="" FontFamily="Arial" DecimalFormat="#0.0#####" LocaleLang="en" LocaleCountry="" LocaleVariant="" LineColor="#000000" LineWidth="0.3" EdgeRadius="1.0"><LeafMargin Left="1.0" Top="0.3" Right="1.0" Bottom="0.3"></LeafMargin><Branch Length="0.004361509" LineColor="#000000" LineWidth="0.3" ConstantWidth="false" MinLength="4.0" MinSpaceAbove="0.0" MinSpaceBelow="0.0"></Branch></Node></Node><Node Text="internalNode34" IsDecimal="false" UniqueName="o6y00k5asw" TextColor="#000000" TextHeight="6.0" TextStyle="" FontFamily="Arial" DecimalFormat="#0.0#####" LocaleLang="en" LocaleCountry="" LocaleVariant="" LineColor="#000000" LineWidth="0.3" EdgeRadius="1.0"><LeafMargin Left="1.0" Top="0.3" Right="1.0" Bottom="0.3"></LeafMargin><Branch Length="0.00891202" LineColor="#000000" LineWidth="0.3" ConstantWidth="false" MinLength="4.0" MinSpaceAbove="0.0" MinSpaceBelow="0.0"><PieChartLabel TextColor="#000000" TextHeight="6.0" TextStyle="" FontFamily="Arial" DecimalFormat="#0.0#####" LocaleLang="en" LocaleCountry="" LocaleVariant="" LineColor="#000000" LineWidth="0.3" Width="6.0" Height="6.0" InternalLines="true" NullLines="false" ShowTitle="false" CaptionType="NONE" CaptionLinkType="STRAIGHT_LINES" Id="6" Above="true" LineNo="0" LinePos="0.0"><LabelMargin Left="1.0" Top="1.0" Right="1.0" Bottom="1.0"></LabelMargin><DataIds TextColor="#000000" TextStyle="" FontFamily="Arial" DecimalFormat="#0.0#####" LocaleLang="en" LocaleCountry="" LocaleVariant=""><DataId PieColor="#0000FF" PieCaption="">6.0</DataId><DataId PieColor="#FF0000" PieCaption="">6.1</DataId></DataIds></PieChartLabel><InvisibleData Id="6.0" Text="0.993699" IsDecimal="true"></InvisibleData><InvisibleData Id="6.1" Text="0.006301" IsDecimal="true"></InvisibleData></Branch><Node Text="Oxyporus japonicus Honshu 19 176" IsDecimal="false" UniqueName="v0tgdbx5aj" TextColor="#000000" TextHeight="6.0" TextStyle="" FontFamily="Arial" DecimalFormat="#0.0#####" LocaleLang="en" LocaleCountry="" LocaleVariant="" LineColor="#000000" LineWidth="0.3" EdgeRadius="1.0"><LeafMargin Left="1.0" Top="0.3" Right="1.0" Bottom="0.3"></LeafMargin><Branch Length="0.01085079" LineColor="#000000" LineWidth="0.3" ConstantWidth="false" MinLength="4.0" MinSpaceAbove="0.0" MinSpaceBelow="0.0"></Branch></Node><Node Text="Oxyporus maxillosus PrimKr 19 172" IsDecimal="false" UniqueName="06ta8rrm70" TextColor="#000000" TextHeight="6.0" TextStyle="" FontFamily="Arial" DecimalFormat="#0.0#####" LocaleLang="en" LocaleCountry="" LocaleVariant="" LineColor="#000000" LineWidth="0.3" EdgeRadius="1.0"><LeafMargin Left="1.0" Top="0.3" Right="1.0" Bottom="0.3"></LeafMargin><Branch Length="0.003107555" LineColor="#000000" LineWidth="0.3" ConstantWidth="false" MinLength="4.0" MinSpaceAbove="0.0" MinSpaceBelow="0.0"></Branch></Node></Node><Node Text="Oxyporus japonicus1 CNUIC572" IsDecimal="false" UniqueName="0it4b179oj" TextColor="#000000" TextHeight="6.0" TextStyle="" FontFamily="Arial" DecimalFormat="#0.0#####" LocaleLang="en" LocaleCountry="" LocaleVariant="" LineColor="#000000" LineWidth="0.3" EdgeRadius="1.0"><LeafMargin Left="1.0" Top="0.3" Right="1.0" Bottom="0.3"></LeafMargin><Branch Length="0.00170398" LineColor="#000000" LineWidth="0.3" ConstantWidth="false" MinLength="4.0" MinSpaceAbove="0.0" MinSpaceBelow="0.0"></Branch></Node><Node Text="internalNode35" IsDecimal="false" UniqueName="ev89vdty08" TextColor="#000000" TextHeight="6.0" TextStyle="" FontFamily="Arial" DecimalFormat="#0.0#####" LocaleLang="en" LocaleCountry="" LocaleVariant="" LineColor="#000000" LineWidth="0.3" EdgeRadius="1.0"><LeafMargin Left="1.0" Top="0.3" Right="1.0" Bottom="0.3"></LeafMargin><Branch Length="0.002115912" LineColor="#000000" LineWidth="0.3" ConstantWidth="false" MinLength="4.0" MinSpaceAbove="0.0" MinSpaceBelow="0.0"><PieChartLabel TextColor="#000000" TextHeight="6.0" TextStyle="" FontFamily="Arial" DecimalFormat="#0.0#####" LocaleLang="en" LocaleCountry="" LocaleVariant="" LineColor="#000000" LineWidth="0.3" Width="6.0" Height="6.0" InternalLines="true" NullLines="false" ShowTitle="false" CaptionType="NONE" CaptionLinkType="STRAIGHT_LINES" Id="6" Above="true" LineNo="0" LinePos="0.0"><LabelMargin Left="1.0" Top="1.0" Right="1.0" Bottom="1.0"></LabelMargin><DataIds TextColor="#000000" TextStyle="" FontFamily="Arial" DecimalFormat="#0.0#####" LocaleLang="en" LocaleCountry="" LocaleVariant=""><DataId PieColor="#0000FF" PieCaption="">6.0</DataId><DataId PieColor="#FF0000" PieCaption="">6.1</DataId></DataIds></PieChartLabel><InvisibleData Id="6.0" Text="0.999413" IsDecimal="true"></InvisibleData><InvisibleData Id="6.1" Text="5.87E-4" IsDecimal="true"></InvisibleData></Branch><Node Text="Oxyporus japonicus10 CNUIC635" IsDecimal="false" UniqueName="79t4z89emw" TextColor="#000000" TextHeight="6.0" TextStyle="" FontFamily="Arial" DecimalFormat="#0.0#####" LocaleLang="en" LocaleCountry="" LocaleVariant="" LineColor="#000000" LineWidth="0.3" EdgeRadius="1.0"><LeafMargin Left="1.0" Top="0.3" Right="1.0" Bottom="0.3"></LeafMargin><Branch Length="0.0011405" LineColor="#000000" LineWidth="0.3" ConstantWidth="false" MinLength="4.0" MinSpaceAbove="0.0" MinSpaceBelow="0.0"></Branch></Node><Node Text="Oxyporus japonicus5 CNUIC518" IsDecimal="false" UniqueName="qz42hqm4aq" TextColor="#000000" TextHeight="6.0" TextStyle="" FontFamily="Arial" DecimalFormat="#0.0#####" LocaleLang="en" LocaleCountry="" LocaleVariant="" LineColor="#000000" LineWidth="0.3" EdgeRadius="1.0"><LeafMargin Left="1.0" Top="0.3" Right="1.0" Bottom="0.3"></LeafMargin><Branch Length="0.002557182" LineColor="#000000" LineWidth="0.3" ConstantWidth="false" MinLength="4.0" MinSpaceAbove="0.0" MinSpaceBelow="0.0"></Branch></Node></Node><Node Text="Oxyporus japonicus2 CNUIC610" IsDecimal="false" UniqueName="uyzy0q8d4f" TextColor="#000000" TextHeight="6.0" TextStyle="" FontFamily="Arial" DecimalFormat="#0.0#####" LocaleLang="en" LocaleCountry="" LocaleVariant="" LineColor="#000000" LineWidth="0.3" EdgeRadius="1.0"><LeafMargin Left="1.0" Top="0.3" Right="1.0" Bottom="0.3"></LeafMargin><Branch Length="0.002462125" LineColor="#000000" LineWidth="0.3" ConstantWidth="false" MinLength="4.0" MinSpaceAbove="0.0" MinSpaceBelow="0.0"></Branch></Node><Node Text="internalNode36" IsDecimal="false" UniqueName="40xphtv019" TextColor="#000000" TextHeight="6.0" TextStyle="" FontFamily="Arial" DecimalFormat="#0.0#####" LocaleLang="en" LocaleCountry="" LocaleVariant="" LineColor="#000000" LineWidth="0.3" EdgeRadius="1.0"><LeafMargin Left="1.0" Top="0.3" Right="1.0" Bottom="0.3"></LeafMargin><Branch Length="0.002507072" LineColor="#000000" LineWidth="0.3" ConstantWidth="false" MinLength="4.0" MinSpaceAbove="0.0" MinSpaceBelow="0.0"><PieChartLabel TextColor="#000000" TextHeight="6.0" TextStyle="" FontFamily="Arial" DecimalFormat="#0.0#####" LocaleLang="en" LocaleCountry="" LocaleVariant="" LineColor="#000000" LineWidth="0.3" Width="6.0" Height="6.0" InternalLines="true" NullLines="false" ShowTitle="false" CaptionType="NONE" CaptionLinkType="STRAIGHT_LINES" Id="6" Above="true" LineNo="0" LinePos="0.0"><LabelMargin Left="1.0" Top="1.0" Right="1.0" Bottom="1.0"></LabelMargin><DataIds TextColor="#000000" TextStyle="" FontFamily="Arial" DecimalFormat="#0.0#####" LocaleLang="en" LocaleCountry="" LocaleVariant=""><DataId PieColor="#0000FF" PieCaption="">6.0</DataId><DataId PieColor="#FF0000" PieCaption="">6.1</DataId></DataIds></PieChartLabel><InvisibleData Id="6.0" Text="0.999178" IsDecimal="true"></InvisibleData><InvisibleData Id="6.1" Text="8.22E-4" IsDecimal="true"></InvisibleData></Branch><Node Text="Oxyporus japonicus4 CNUIC612" IsDecimal="false" UniqueName="xp5qrmbxl3" TextColor="#000000" TextHeight="6.0" TextStyle="" FontFamily="Arial" DecimalFormat="#0.0#####" LocaleLang="en" LocaleCountry="" LocaleVariant="" LineColor="#000000" LineWidth="0.3" EdgeRadius="1.0"><LeafMargin Left="1.0" Top="0.3" Right="1.0" Bottom="0.3"></LeafMargin><Branch Length="0.003949345" LineColor="#000000" LineWidth="0.3" ConstantWidth="false" MinLength="4.0" MinSpaceAbove="0.0" MinSpaceBelow="0.0"></Branch></Node><Node Text="Oxyporus japonicus6 CNUIC607" IsDecimal="false" UniqueName="rndx9i12hq" TextColor="#000000" TextHeight="6.0" TextStyle="" FontFamily="Arial" DecimalFormat="#0.0#####" LocaleLang="en" LocaleCountry="" LocaleVariant="" LineColor="#000000" LineWidth="0.3" EdgeRadius="1.0"><LeafMargin Left="1.0" Top="0.3" Right="1.0" Bottom="0.3"></LeafMargin><Branch Length="0.001043314" LineColor="#000000" LineWidth="0.3" ConstantWidth="false" MinLength="4.0" MinSpaceAbove="0.0" MinSpaceBelow="0.0"></Branch></Node></Node><Node Text="Oxyporus japonicus8 CNUIC609" IsDecimal="false" UniqueName="b9r6yleisz" TextColor="#000000" TextHeight="6.0" TextStyle="" FontFamily="Arial" DecimalFormat="#0.0#####" LocaleLang="en" LocaleCountry="" LocaleVariant="" LineColor="#000000" LineWidth="0.3" EdgeRadius="1.0"><LeafMargin Left="1.0" Top="0.3" Right="1.0" Bottom="0.3"></LeafMargin><Branch Length="0.007091306" LineColor="#000000" LineWidth="0.3" ConstantWidth="false" MinLength="4.0" MinSpaceAbove="0.0" MinSpaceBelow="0.0"></Branch></Node><Node Text="internalNode37" IsDecimal="false" UniqueName="ym8zont3gz" TextColor="#000000" TextHeight="6.0" TextStyle="" FontFamily="Arial" DecimalFormat="#0.0#####" LocaleLang="en" LocaleCountry="" LocaleVariant="" LineColor="#000000" LineWidth="0.3" EdgeRadius="1.0"><LeafMargin Left="1.0" Top="0.3" Right="1.0" Bottom="0.3"></LeafMargin><Branch Length="0.003804276" LineColor="#000000" LineWidth="0.3" ConstantWidth="false" MinLength="4.0" MinSpaceAbove="0.0" MinSpaceBelow="0.0"><PieChartLabel TextColor="#000000" TextHeight="6.0" TextStyle="" FontFamily="Arial" DecimalFormat="#0.0#####" LocaleLang="en" LocaleCountry="" LocaleVariant="" LineColor="#000000" LineWidth="0.3" Width="6.0" Height="6.0" InternalLines="true" NullLines="false" ShowTitle="false" CaptionType="NONE" CaptionLinkType="STRAIGHT_LINES" Id="6" Above="true" LineNo="0" LinePos="0.0"><LabelMargin Left="1.0" Top="1.0" Right="1.0" Bottom="1.0"></LabelMargin><DataIds TextColor="#000000" TextStyle="" FontFamily="Arial" DecimalFormat="#0.0#####" LocaleLang="en" LocaleCountry="" LocaleVariant=""><DataId PieColor="#0000FF" PieCaption="">6.0</DataId><DataId PieColor="#FF0000" PieCaption="">6.1</DataId></DataIds></PieChartLabel><InvisibleData Id="6.0" Text="1.0" IsDecimal="true"></InvisibleData><InvisibleData Id="6.1" Text="0.0" IsDecimal="true"></InvisibleData></Branch><Node Text="Oxyporus maxillosus Altay19 14" IsDecimal="false" UniqueName="25ihbvdoi7" TextColor="#000000" TextHeight="6.0" TextStyle="" FontFamily="Arial" DecimalFormat="#0.0#####" LocaleLang="en" LocaleCountry="" LocaleVariant="" LineColor="#000000" LineWidth="0.3" EdgeRadius="1.0"><LeafMargin Left="1.0" Top="0.3" Right="1.0" Bottom="0.3"></LeafMargin><Branch Length="0.001031708" LineColor="#000000" LineWidth="0.3" ConstantWidth="false" MinLength="4.0" MinSpaceAbove="0.0" MinSpaceBelow="0.0"></Branch></Node><Node Text="Oxyporus maxillosus Altay19 50b 15" IsDecimal="false" UniqueName="15hidkowfv" TextColor="#000000" TextHeight="6.0" TextStyle="" FontFamily="Arial" DecimalFormat="#0.0#####" LocaleLang="en" LocaleCountry="" LocaleVariant="" LineColor="#000000" LineWidth="0.3" EdgeRadius="1.0"><LeafMargin Left="1.0" Top="0.3" Right="1.0" Bottom="0.3"></LeafMargin><Branch Length="0.002400905" LineColor="#000000" LineWidth="0.3" ConstantWidth="false" MinLength="4.0" MinSpaceAbove="0.0" MinSpaceBelow="0.0"></Branch></Node><Node Text="Oxyporus maxillosus Buryatia19 12" IsDecimal="false" UniqueName="8h4jlhhgfm" TextColor="#000000" TextHeight="6.0" TextStyle="" FontFamily="Arial" DecimalFormat="#0.0#####" LocaleLang="en" LocaleCountry="" LocaleVariant="" LineColor="#000000" LineWidth="0.3" EdgeRadius="1.0"><LeafMargin Left="1.0" Top="0.3" Right="1.0" Bottom="0.3"></LeafMargin><Branch Length="0.00101337" LineColor="#000000" LineWidth="0.3" ConstantWidth="false" MinLength="4.0" MinSpaceAbove="0.0" MinSpaceBelow="0.0"></Branch></Node><Node Text="Oxyporus maxillosus Ch Mans 05" IsDecimal="false" UniqueName="a0r4o81ltt" TextColor="#000000" TextHeight="6.0" TextStyle="" FontFamily="Arial" DecimalFormat="#0.0#####" LocaleLang="en" LocaleCountry="" LocaleVariant="" LineColor="#000000" LineWidth="0.3" EdgeRadius="1.0"><LeafMargin Left="1.0" Top="0.3" Right="1.0" Bottom="0.3"></LeafMargin><Branch Length="0.001028518" LineColor="#000000" LineWidth="0.3" ConstantWidth="false" MinLength="4.0" MinSpaceAbove="0.0" MinSpaceBelow="0.0"></Branch></Node><Node Text="Oxyporus maxillosus Ch Mans 22" IsDecimal="false" UniqueName="0cn86539tb" TextColor="#000000" TextHeight="6.0" TextStyle="" FontFamily="Arial" DecimalFormat="#0.0#####" LocaleLang="en" LocaleCountry="" LocaleVariant="" LineColor="#000000" LineWidth="0.3" EdgeRadius="1.0"><LeafMargin Left="1.0" Top="0.3" Right="1.0" Bottom="0.3"></LeafMargin><Branch Length="0.00207992" LineColor="#000000" LineWidth="0.3" ConstantWidth="false" MinLength="4.0" MinSpaceAbove="0.0" MinSpaceBelow="0.0"></Branch></Node><Node Text="Oxyporus maxillosus Czech16 23" IsDecimal="false" UniqueName="bvhtyoff15" TextColor="#000000" TextHeight="6.0" TextStyle="" FontFamily="Arial" DecimalFormat="#0.0#####" LocaleLang="en" LocaleCountry="" LocaleVariant="" LineColor="#000000" LineWidth="0.3" EdgeRadius="1.0"><LeafMargin Left="1.0" Top="0.3" Right="1.0" Bottom="0.3"></LeafMargin><Branch Length="0.003750069" LineColor="#000000" LineWidth="0.3" ConstantWidth="false" MinLength="4.0" MinSpaceAbove="0.0" MinSpaceBelow="0.0"></Branch></Node><Node Text="Oxyporus maxillosus Irkutsk95 19 175" IsDecimal="false" UniqueName="eld5nm44iu" TextColor="#000000" TextHeight="6.0" TextStyle="" FontFamily="Arial" DecimalFormat="#0.0#####" LocaleLang="en" LocaleCountry="" LocaleVariant="" LineColor="#000000" LineWidth="0.3" EdgeRadius="1.0"><LeafMargin Left="1.0" Top="0.3" Right="1.0" Bottom="0.3"></LeafMargin><Branch Length="0.001882188" LineColor="#000000" LineWidth="0.3" ConstantWidth="false" MinLength="4.0" MinSpaceAbove="0.0" MinSpaceBelow="0.0"></Branch></Node><Node Text="Oxyporus maxillosus Sverdl19 24" IsDecimal="false" UniqueName="q9m5l7xgpm" TextColor="#000000" TextHeight="6.0" TextStyle="" FontFamily="Arial" DecimalFormat="#0.0#####" LocaleLang="en" LocaleCountry="" LocaleVariant="" LineColor="#000000" LineWidth="0.3" EdgeRadius="1.0"><LeafMargin Left="1.0" Top="0.3" Right="1.0" Bottom="0.3"></LeafMargin><Branch Length="0.001031678" LineColor="#000000" LineWidth="0.3" ConstantWidth="false" MinLength="4.0" MinSpaceAbove="0.0" MinSpaceBelow="0.0"></Branch></Node></Node><Node Text="Oxyporus maxillosus AnisimFE19 28" IsDecimal="false" UniqueName="bbulp15qo2" TextColor="#000000" TextHeight="6.0" TextStyle="" FontFamily="Arial" DecimalFormat="#0.0#####" LocaleLang="en" LocaleCountry="" LocaleVariant="" LineColor="#000000" LineWidth="0.3" EdgeRadius="1.0"><LeafMargin Left="1.0" Top="0.3" Right="1.0" Bottom="0.3"></LeafMargin><Branch Length="0.001041284" LineColor="#000000" LineWidth="0.3" ConstantWidth="false" MinLength="4.0" MinSpaceAbove="0.0" MinSpaceBelow="0.0"></Branch></Node><Node Text="Oxyporus maxillosus GornTaezhFE18" IsDecimal="false" UniqueName="k7bmr09odt" TextColor="#000000" TextHeight="6.0" TextStyle="" FontFamily="Arial" DecimalFormat="#0.0#####" LocaleLang="en" LocaleCountry="" LocaleVariant="" LineColor="#000000" LineWidth="0.3" EdgeRadius="1.0"><LeafMargin Left="1.0" Top="0.3" Right="1.0" Bottom="0.3"></LeafMargin><Branch Length="0.001059361" LineColor="#000000" LineWidth="0.3" ConstantWidth="false" MinLength="4.0" MinSpaceAbove="0.0" MinSpaceBelow="0.0"></Branch></Node><Node Text="Oxyporus maxillosus GornTaezhFE18 03" IsDecimal="false" UniqueName="1cb6xnki8q" TextColor="#000000" TextHeight="6.0" TextStyle="" FontFamily="Arial" DecimalFormat="#0.0#####" LocaleLang="en" LocaleCountry="" LocaleVariant="" LineColor="#000000" LineWidth="0.3" EdgeRadius="1.0"><LeafMargin Left="1.0" Top="0.3" Right="1.0" Bottom="0.3"></LeafMargin><Branch Length="0.002364423" LineColor="#000000" LineWidth="0.3" ConstantWidth="false" MinLength="4.0" MinSpaceAbove="0.0" MinSpaceBelow="0.0"></Branch></Node><Node Text="Oxyporus maxillosus GornTaezhFE18 37" IsDecimal="false" UniqueName="hie50mzqqy" TextColor="#000000" TextHeight="6.0" TextStyle="" FontFamily="Arial" DecimalFormat="#0.0#####" LocaleLang="en" LocaleCountry="" LocaleVariant="" LineColor="#000000" LineWidth="0.3" EdgeRadius="1.0"><LeafMargin Left="1.0" Top="0.3" Right="1.0" Bottom="0.3"></LeafMargin><Branch Length="9.97839E-4" LineColor="#000000" LineWidth="0.3" ConstantWidth="false" MinLength="4.0" MinSpaceAbove="0.0" MinSpaceBelow="0.0"></Branch></Node><Node Text="Oxyporus maxillosus larvaGornTaezhFE18" IsDecimal="false" UniqueName="2jy85x8v7e" TextColor="#000000" TextHeight="6.0" TextStyle="" FontFamily="Arial" DecimalFormat="#0.0#####" LocaleLang="en" LocaleCountry="" LocaleVariant="" LineColor="#000000" LineWidth="0.3" EdgeRadius="1.0"><LeafMargin Left="1.0" Top="0.3" Right="1.0" Bottom="0.3"></LeafMargin><Branch Length="0.001009975" LineColor="#000000" LineWidth="0.3" ConstantWidth="false" MinLength="4.0" MinSpaceAbove="0.0" MinSpaceBelow="0.0"></Branch></Node></Node><Node Text="Oxyporus japonicus3 CNUIC611" IsDecimal="false" UniqueName="rowutxx7cb" TextColor="#000000" TextHeight="6.0" TextStyle="" FontFamily="Arial" DecimalFormat="#0.0#####" LocaleLang="en" LocaleCountry="" LocaleVariant="" LineColor="#000000" LineWidth="0.3" EdgeRadius="1.0"><LeafMargin Left="1.0" Top="0.3" Right="1.0" Bottom="0.3"></LeafMargin><Branch Length="0.003965777" LineColor="#000000" LineWidth="0.3" ConstantWidth="false" MinLength="4.0" MinSpaceAbove="0.0" MinSpaceBelow="0.0"></Branch></Node><Node Text="Oxyporus japonicus7 CNUIC608" IsDecimal="false" UniqueName="p9a9t706uz" TextColor="#000000" TextHeight="6.0" TextStyle="" FontFamily="Arial" DecimalFormat="#0.0#####" LocaleLang="en" LocaleCountry="" LocaleVariant="" LineColor="#000000" LineWidth="0.3" EdgeRadius="1.0"><LeafMargin Left="1.0" Top="0.3" Right="1.0" Bottom="0.3"></LeafMargin><Branch Length="0.002555539" LineColor="#000000" LineWidth="0.3" ConstantWidth="false" MinLength="4.0" MinSpaceAbove="0.0" MinSpaceBelow="0.0"></Branch></Node><Node Text="Oxyporus japonicus9 CNUIC631" IsDecimal="false" UniqueName="j7n8qmyu8u" TextColor="#000000" TextHeight="6.0" TextStyle="" FontFamily="Arial" DecimalFormat="#0.0#####" LocaleLang="en" LocaleCountry="" LocaleVariant="" LineColor="#000000" LineWidth="0.3" EdgeRadius="1.0"><LeafMargin Left="1.0" Top="0.3" Right="1.0" Bottom="0.3"></LeafMargin><Branch Length="9.993379E-4" LineColor="#000000" LineWidth="0.3" ConstantWidth="false" MinLength="4.0" MinSpaceAbove="0.0" MinSpaceBelow="0.0"></Branch></Node></Node><Node Text="internalNode38" IsDecimal="false" UniqueName="fwoakkckbz" TextColor="#000000" TextHeight="6.0" TextStyle="" FontFamily="Arial" DecimalFormat="#0.0#####" LocaleLang="en" LocaleCountry="" LocaleVariant="" LineColor="#000000" LineWidth="0.3" EdgeRadius="1.0"><LeafMargin Left="1.0" Top="0.3" Right="1.0" Bottom="0.3"></LeafMargin><Branch Length="0.0278175" LineColor="#000000" LineWidth="0.3" ConstantWidth="false" MinLength="4.0" MinSpaceAbove="0.0" MinSpaceBelow="0.0"><PieChartLabel TextColor="#000000" TextHeight="6.0" TextStyle="" FontFamily="Arial" DecimalFormat="#0.0#####" LocaleLang="en" LocaleCountry="" LocaleVariant="" LineColor="#000000" LineWidth="0.3" Width="6.0" Height="6.0" InternalLines="true" NullLines="false" ShowTitle="false" CaptionType="NONE" CaptionLinkType="STRAIGHT_LINES" Id="6" Above="true" LineNo="0" LinePos="0.0"><LabelMargin Left="1.0" Top="1.0" Right="1.0" Bottom="1.0"></LabelMargin><DataIds TextColor="#000000" TextStyle="" FontFamily="Arial" DecimalFormat="#0.0#####" LocaleLang="en" LocaleCountry="" LocaleVariant=""><DataId PieColor="#0000FF" PieCaption="">6.0</DataId><DataId PieColor="#FF0000" PieCaption="">6.1</DataId></DataIds></PieChartLabel><InvisibleData Id="6.0" Text="0.999769" IsDecimal="true"></InvisibleData><InvisibleData Id="6.1" Text="2.31E-4" IsDecimal="true"></InvisibleData></Branch><Node Text="Oxyporus niger AnisimFE19 27" IsDecimal="false" UniqueName="ckghxsaoq7" TextColor="#000000" TextHeight="6.0" TextStyle="" FontFamily="Arial" DecimalFormat="#0.0#####" LocaleLang="en" LocaleCountry="" LocaleVariant="" LineColor="#000000" LineWidth="0.3" EdgeRadius="1.0"><LeafMargin Left="1.0" Top="0.3" Right="1.0" Bottom="0.3"></LeafMargin><Branch Length="0.003877145" LineColor="#000000" LineWidth="0.3" ConstantWidth="false" MinLength="4.0" MinSpaceAbove="0.0" MinSpaceBelow="0.0"></Branch></Node><Node Text="internalNode39" IsDecimal="false" UniqueName="02xtyzgmzu" TextColor="#000000" TextHeight="6.0" TextStyle="" FontFamily="Arial" DecimalFormat="#0.0#####" LocaleLang="en" LocaleCountry="" LocaleVariant="" LineColor="#000000" LineWidth="0.3" EdgeRadius="1.0"><LeafMargin Left="1.0" Top="0.3" Right="1.0" Bottom="0.3"></LeafMargin><Branch Length="0.006298653" LineColor="#000000" LineWidth="0.3" ConstantWidth="false" MinLength="4.0" MinSpaceAbove="0.0" MinSpaceBelow="0.0"><PieChartLabel TextColor="#000000" TextHeight="6.0" TextStyle="" FontFamily="Arial" DecimalFormat="#0.0#####" LocaleLang="en" LocaleCountry="" LocaleVariant="" LineColor="#000000" LineWidth="0.3" Width="6.0" Height="6.0" InternalLines="true" NullLines="false" ShowTitle="false" CaptionType="NONE" CaptionLinkType="STRAIGHT_LINES" Id="6" Above="true" LineNo="0" LinePos="0.0"><LabelMargin Left="1.0" Top="1.0" Right="1.0" Bottom="1.0"></LabelMargin><DataIds TextColor="#000000" TextStyle="" FontFamily="Arial" DecimalFormat="#0.0#####" LocaleLang="en" LocaleCountry="" LocaleVariant=""><DataId PieColor="#0000FF" PieCaption="">6.0</DataId><DataId PieColor="#FF0000" PieCaption="">6.1</DataId></DataIds></PieChartLabel><InvisibleData Id="6.0" Text="0.997321" IsDecimal="true"></InvisibleData><InvisibleData Id="6.1" Text="0.002679" IsDecimal="true"></InvisibleData></Branch><Node Text="Oxyporus niger GornTaezhFE18 29" IsDecimal="false" UniqueName="r04ncdyudd" TextColor="#000000" TextHeight="6.0" TextStyle="" FontFamily="Arial" DecimalFormat="#0.0#####" LocaleLang="en" LocaleCountry="" LocaleVariant="" LineColor="#000000" LineWidth="0.3" EdgeRadius="1.0"><LeafMargin Left="1.0" Top="0.3" Right="1.0" Bottom="0.3"></LeafMargin><Branch Length="0.002550665" LineColor="#000000" LineWidth="0.3" ConstantWidth="false" MinLength="4.0" MinSpaceAbove="0.0" MinSpaceBelow="0.0"></Branch></Node><Node Text="Oxyporus niger ListvFE19 31" IsDecimal="false" UniqueName="40nroinikf" TextColor="#000000" TextHeight="6.0" TextStyle="" FontFamily="Arial" DecimalFormat="#0.0#####" LocaleLang="en" LocaleCountry="" LocaleVariant="" LineColor="#000000" LineWidth="0.3" EdgeRadius="1.0"><LeafMargin Left="1.0" Top="0.3" Right="1.0" Bottom="0.3"></LeafMargin><Branch Length="0.005380707" LineColor="#000000" LineWidth="0.3" ConstantWidth="false" MinLength="4.0" MinSpaceAbove="0.0" MinSpaceBelow="0.0"></Branch></Node></Node><Node Text="internalNode40" IsDecimal="false" UniqueName="4u8zg2sz8g" TextColor="#000000" TextHeight="6.0" TextStyle="" FontFamily="Arial" DecimalFormat="#0.0#####" LocaleLang="en" LocaleCountry="" LocaleVariant="" LineColor="#000000" LineWidth="0.3" EdgeRadius="1.0"><LeafMargin Left="1.0" Top="0.3" Right="1.0" Bottom="0.3"></LeafMargin><Branch Length="0.002559094" LineColor="#000000" LineWidth="0.3" ConstantWidth="false" MinLength="4.0" MinSpaceAbove="0.0" MinSpaceBelow="0.0"><PieChartLabel TextColor="#000000" TextHeight="6.0" TextStyle="" FontFamily="Arial" DecimalFormat="#0.0#####" LocaleLang="en" LocaleCountry="" LocaleVariant="" LineColor="#000000" LineWidth="0.3" Width="6.0" Height="6.0" InternalLines="true" NullLines="false" ShowTitle="false" CaptionType="NONE" CaptionLinkType="STRAIGHT_LINES" Id="6" Above="true" LineNo="0" LinePos="0.0"><LabelMargin Left="1.0" Top="1.0" Right="1.0" Bottom="1.0"></LabelMargin><DataIds TextColor="#000000" TextStyle="" FontFamily="Arial" DecimalFormat="#0.0#####" LocaleLang="en" LocaleCountry="" LocaleVariant=""><DataId PieColor="#0000FF" PieCaption="">6.0</DataId><DataId PieColor="#FF0000" PieCaption="">6.1</DataId></DataIds></PieChartLabel><InvisibleData Id="6.0" Text="0.988143" IsDecimal="true"></InvisibleData><InvisibleData Id="6.1" Text="0.011857" IsDecimal="true"></InvisibleData></Branch><Node Text="Oxyporus niger1 CNUIC 0576" IsDecimal="false" UniqueName="vcmo7xmozy" TextColor="#000000" TextHeight="6.0" TextStyle="" FontFamily="Arial" DecimalFormat="#0.0#####" LocaleLang="en" LocaleCountry="" LocaleVariant="" LineColor="#000000" LineWidth="0.3" EdgeRadius="1.0"><LeafMargin Left="1.0" Top="0.3" Right="1.0" Bottom="0.3"></LeafMargin><Branch Length="0.005535998" LineColor="#000000" LineWidth="0.3" ConstantWidth="false" MinLength="4.0" MinSpaceAbove="0.0" MinSpaceBelow="0.0"></Branch></Node><Node Text="internalNode41" IsDecimal="false" UniqueName="002m2tjs2r" TextColor="#000000" TextHeight="6.0" TextStyle="" FontFamily="Arial" DecimalFormat="#0.0#####" LocaleLang="en" LocaleCountry="" LocaleVariant="" LineColor="#000000" LineWidth="0.3" EdgeRadius="1.0"><LeafMargin Left="1.0" Top="0.3" Right="1.0" Bottom="0.3"></LeafMargin><Branch Length="0.01177475" LineColor="#000000" LineWidth="0.3" ConstantWidth="false" MinLength="4.0" MinSpaceAbove="0.0" MinSpaceBelow="0.0"><PieChartLabel TextColor="#000000" TextHeight="6.0" TextStyle="" FontFamily="Arial" DecimalFormat="#0.0#####" LocaleLang="en" LocaleCountry="" LocaleVariant="" LineColor="#000000" LineWidth="0.3" Width="6.0" Height="6.0" InternalLines="true" NullLines="false" ShowTitle="false" CaptionType="NONE" CaptionLinkType="STRAIGHT_LINES" Id="6" Above="true" LineNo="0" LinePos="0.0"><LabelMargin Left="1.0" Top="1.0" Right="1.0" Bottom="1.0"></LabelMargin><DataIds TextColor="#000000" TextStyle="" FontFamily="Arial" DecimalFormat="#0.0#####" LocaleLang="en" LocaleCountry="" LocaleVariant=""><DataId PieColor="#0000FF" PieCaption="">6.0</DataId><DataId PieColor="#FF0000" PieCaption="">6.1</DataId></DataIds></PieChartLabel><InvisibleData Id="6.0" Text="0.999797" IsDecimal="true"></InvisibleData><InvisibleData Id="6.1" Text="2.03E-4" IsDecimal="true"></InvisibleData></Branch><Node Text="Oxyporus niger5 CNUIC 0580" IsDecimal="false" UniqueName="94y6kxbrqj" TextColor="#000000" TextHeight="6.0" TextStyle="" FontFamily="Arial" DecimalFormat="#0.0#####" LocaleLang="en" LocaleCountry="" LocaleVariant="" LineColor="#000000" LineWidth="0.3" EdgeRadius="1.0"><LeafMargin Left="1.0" Top="0.3" Right="1.0" Bottom="0.3"></LeafMargin><Branch Length="9.954876E-4" LineColor="#000000" LineWidth="0.3" ConstantWidth="false" MinLength="4.0" MinSpaceAbove="0.0" MinSpaceBelow="0.0"></Branch></Node><Node Text="Oxyporus niger6 CNUIC 0581" IsDecimal="false" UniqueName="g15bta1h3i" TextColor="#000000" TextHeight="6.0" TextStyle="" FontFamily="Arial" DecimalFormat="#0.0#####" LocaleLang="en" LocaleCountry="" LocaleVariant="" LineColor="#000000" LineWidth="0.3" EdgeRadius="1.0"><LeafMargin Left="1.0" Top="0.3" Right="1.0" Bottom="0.3"></LeafMargin><Branch Length="9.993335E-4" LineColor="#000000" LineWidth="0.3" ConstantWidth="false" MinLength="4.0" MinSpaceAbove="0.0" MinSpaceBelow="0.0"></Branch></Node></Node></Node></Node></Node><Node Text="internalNode42" IsDecimal="false" UniqueName="hd1nwen8d4" TextColor="#000000" TextHeight="6.0" TextStyle="" FontFamily="Arial" DecimalFormat="#0.0#####" LocaleLang="en" LocaleCountry="" LocaleVariant="" LineColor="#000000" LineWidth="0.3" EdgeRadius="1.0"><LeafMargin Left="1.0" Top="0.3" Right="1.0" Bottom="0.3"></LeafMargin><Branch Length="0.05090168" LineColor="#000000" LineWidth="0.3" ConstantWidth="false" MinLength="4.0" MinSpaceAbove="0.0" MinSpaceBelow="0.0"><PieChartLabel TextColor="#000000" TextHeight="6.0" TextStyle="" FontFamily="Arial" DecimalFormat="#0.0#####" LocaleLang="en" LocaleCountry="" LocaleVariant="" LineColor="#000000" LineWidth="0.3" Width="6.0" Height="6.0" InternalLines="true" NullLines="false" ShowTitle="false" CaptionType="NONE" CaptionLinkType="STRAIGHT_LINES" Id="6" Above="true" LineNo="0" LinePos="0.0"><LabelMargin Left="1.0" Top="1.0" Right="1.0" Bottom="1.0"></LabelMargin><DataIds TextColor="#000000" TextStyle="" FontFamily="Arial" DecimalFormat="#0.0#####" LocaleLang="en" LocaleCountry="" LocaleVariant=""><DataId PieColor="#0000FF" PieCaption="">6.0</DataId><DataId PieColor="#FF0000" PieCaption="">6.1</DataId></DataIds></PieChartLabel><InvisibleData Id="6.0" Text="0.995594" IsDecimal="true"></InvisibleData><InvisibleData Id="6.1" Text="0.004406" IsDecimal="true"></InvisibleData></Branch><Node Text="Oxyporus procerus CNUIC590" IsDecimal="false" UniqueName="915eh2vzl4" TextColor="#000000" TextHeight="6.0" TextStyle="" FontFamily="Arial" DecimalFormat="#0.0#####" LocaleLang="en" LocaleCountry="" LocaleVariant="" LineColor="#000000" LineWidth="0.3" EdgeRadius="1.0"><LeafMargin Left="1.0" Top="0.3" Right="1.0" Bottom="0.3"></LeafMargin><Branch Length="0.005374603" LineColor="#000000" LineWidth="0.3" ConstantWidth="false" MinLength="4.0" MinSpaceAbove="0.0" MinSpaceBelow="0.0"></Branch></Node><Node Text="internalNode43" IsDecimal="false" UniqueName="od2i1o0o9q" TextColor="#000000" TextHeight="6.0" TextStyle="" FontFamily="Arial" DecimalFormat="#0.0#####" LocaleLang="en" LocaleCountry="" LocaleVariant="" LineColor="#000000" LineWidth="0.3" EdgeRadius="1.0"><LeafMargin Left="1.0" Top="0.3" Right="1.0" Bottom="0.3"></LeafMargin><Branch Length="0.00423988" LineColor="#000000" LineWidth="0.3" ConstantWidth="false" MinLength="4.0" MinSpaceAbove="0.0" MinSpaceBelow="0.0"><PieChartLabel TextColor="#000000" TextHeight="6.0" TextStyle="" FontFamily="Arial" DecimalFormat="#0.0#####" LocaleLang="en" LocaleCountry="" LocaleVariant="" LineColor="#000000" LineWidth="0.3" Width="6.0" Height="6.0" InternalLines="true" NullLines="false" ShowTitle="false" CaptionType="NONE" CaptionLinkType="STRAIGHT_LINES" Id="6" Above="true" LineNo="0" LinePos="0.0"><LabelMargin Left="1.0" Top="1.0" Right="1.0" Bottom="1.0"></LabelMargin><DataIds TextColor="#000000" TextStyle="" FontFamily="Arial" DecimalFormat="#0.0#####" LocaleLang="en" LocaleCountry="" LocaleVariant=""><DataId PieColor="#0000FF" PieCaption="">6.0</DataId><DataId PieColor="#FF0000" PieCaption="">6.1</DataId></DataIds></PieChartLabel><InvisibleData Id="6.0" Text="0.999783" IsDecimal="true"></InvisibleData><InvisibleData Id="6.1" Text="2.17E-4" IsDecimal="true"></InvisibleData></Branch><Node Text="Oxyporus procerus GornTaezhFE18" IsDecimal="false" UniqueName="g683ohipfd" TextColor="#000000" TextHeight="6.0" TextStyle="" FontFamily="Arial" DecimalFormat="#0.0#####" LocaleLang="en" LocaleCountry="" LocaleVariant="" LineColor="#000000" LineWidth="0.3" EdgeRadius="1.0"><LeafMargin Left="1.0" Top="0.3" Right="1.0" Bottom="0.3"></LeafMargin><Branch Length="0.001027912" LineColor="#000000" LineWidth="0.3" ConstantWidth="false" MinLength="4.0" MinSpaceAbove="0.0" MinSpaceBelow="0.0"></Branch></Node><Node Text="Oxyporus procerus larvaGornTaezhFE18" IsDecimal="false" UniqueName="2q28sutfe7" TextColor="#000000" TextHeight="6.0" TextStyle="" FontFamily="Arial" DecimalFormat="#0.0#####" LocaleLang="en" LocaleCountry="" LocaleVariant="" LineColor="#000000" LineWidth="0.3" EdgeRadius="1.0"><LeafMargin Left="1.0" Top="0.3" Right="1.0" Bottom="0.3"></LeafMargin><Branch Length="0.001036376" LineColor="#000000" LineWidth="0.3" ConstantWidth="false" MinLength="4.0" MinSpaceAbove="0.0" MinSpaceBelow="0.0"></Branch></Node></Node></Node></Node></Node><Node Text="internalNode44" IsDecimal="false" UniqueName="vquwmff6wm" TextColor="#000000" TextHeight="6.0" TextStyle="" FontFamily="Arial" DecimalFormat="#0.0#####" LocaleLang="en" LocaleCountry="" LocaleVariant="" LineColor="#000000" LineWidth="0.3" EdgeRadius="1.0"><LeafMargin Left="1.0" Top="0.3" Right="1.0" Bottom="0.3"></LeafMargin><Branch Length="0.03728185" LineColor="#000000" LineWidth="0.3" ConstantWidth="false" MinLength="4.0" MinSpaceAbove="0.0" MinSpaceBelow="0.0"><PieChartLabel TextColor="#000000" TextHeight="6.0" TextStyle="" FontFamily="Arial" DecimalFormat="#0.0#####" LocaleLang="en" LocaleCountry="" LocaleVariant="" LineColor="#000000" LineWidth="0.3" Width="6.0" Height="6.0" InternalLines="true" NullLines="false" ShowTitle="false" CaptionType="NONE" CaptionLinkType="STRAIGHT_LINES" Id="6" Above="true" LineNo="0" LinePos="0.0"><LabelMargin Left="1.0" Top="1.0" Right="1.0" Bottom="1.0"></LabelMargin><DataIds TextColor="#000000" TextStyle="" FontFamily="Arial" DecimalFormat="#0.0#####" LocaleLang="en" LocaleCountry="" LocaleVariant=""><DataId PieColor="#0000FF" PieCaption="">6.0</DataId><DataId PieColor="#FF0000" PieCaption="">6.1</DataId></DataIds></PieChartLabel><InvisibleData Id="6.0" Text="0.859079" IsDecimal="true"></InvisibleData><InvisibleData Id="6.1" Text="0.140921" IsDecimal="true"></InvisibleData></Branch><Node Text="internalNode45" IsDecimal="false" UniqueName="1p9r595gc0" TextColor="#000000" TextHeight="6.0" TextStyle="" FontFamily="Arial" DecimalFormat="#0.0#####" LocaleLang="en" LocaleCountry="" LocaleVariant="" LineColor="#000000" LineWidth="0.3" EdgeRadius="1.0"><LeafMargin Left="1.0" Top="0.3" Right="1.0" Bottom="0.3"></LeafMargin><Branch Length="0.02315972" LineColor="#000000" LineWidth="0.3" ConstantWidth="false" MinLength="4.0" MinSpaceAbove="0.0" MinSpaceBelow="0.0"><PieChartLabel TextColor="#000000" TextHeight="6.0" TextStyle="" FontFamily="Arial" DecimalFormat="#0.0#####" LocaleLang="en" LocaleCountry="" LocaleVariant="" LineColor="#000000" LineWidth="0.3" Width="6.0" Height="6.0" InternalLines="true" NullLines="false" ShowTitle="false" CaptionType="NONE" CaptionLinkType="STRAIGHT_LINES" Id="6" Above="true" LineNo="0" LinePos="0.0"><LabelMargin Left="1.0" Top="1.0" Right="1.0" Bottom="1.0"></LabelMargin><DataIds TextColor="#000000" TextStyle="" FontFamily="Arial" DecimalFormat="#0.0#####" LocaleLang="en" LocaleCountry="" LocaleVariant=""><DataId PieColor="#0000FF" PieCaption="">6.0</DataId><DataId PieColor="#FF0000" PieCaption="">6.1</DataId></DataIds></PieChartLabel><InvisibleData Id="6.0" Text="0.989577" IsDecimal="true"></InvisibleData><InvisibleData Id="6.1" Text="0.010423" IsDecimal="true"></InvisibleData></Branch><Node Text="internalNode46" IsDecimal="false" UniqueName="09kxp3bg1o" TextColor="#000000" TextHeight="6.0" TextStyle="" FontFamily="Arial" DecimalFormat="#0.0#####" LocaleLang="en" LocaleCountry="" LocaleVariant="" LineColor="#000000" LineWidth="0.3" EdgeRadius="1.0"><LeafMargin Left="1.0" Top="0.3" Right="1.0" Bottom="0.3"></LeafMargin><Branch Length="0.006573462" LineColor="#000000" LineWidth="0.3" ConstantWidth="false" MinLength="4.0" MinSpaceAbove="0.0" MinSpaceBelow="0.0"><PieChartLabel TextColor="#000000" TextHeight="6.0" TextStyle="" FontFamily="Arial" DecimalFormat="#0.0#####" LocaleLang="en" LocaleCountry="" LocaleVariant="" LineColor="#000000" LineWidth="0.3" Width="6.0" Height="6.0" InternalLines="true" NullLines="false" ShowTitle="false" CaptionType="NONE" CaptionLinkType="STRAIGHT_LINES" Id="6" Above="true" LineNo="0" LinePos="0.0"><LabelMargin Left="1.0" Top="1.0" Right="1.0" Bottom="1.0"></LabelMargin><DataIds TextColor="#000000" TextStyle="" FontFamily="Arial" DecimalFormat="#0.0#####" LocaleLang="en" LocaleCountry="" LocaleVariant=""><DataId PieColor="#0000FF" PieCaption="">6.0</DataId><DataId PieColor="#FF0000" PieCaption="">6.1</DataId></DataIds></PieChartLabel><InvisibleData Id="6.0" Text="0.996754" IsDecimal="true"></InvisibleData><InvisibleData Id="6.1" Text="0.003246" IsDecimal="true"></InvisibleData></Branch><Node Text="internalNode47" IsDecimal="false" UniqueName="su73m22v8f" TextColor="#000000" TextHeight="6.0" TextStyle="" FontFamily="Arial" DecimalFormat="#0.0#####" LocaleLang="en" LocaleCountry="" LocaleVariant="" LineColor="#000000" LineWidth="0.3" EdgeRadius="1.0"><LeafMargin Left="1.0" Top="0.3" Right="1.0" Bottom="0.3"></LeafMargin><Branch Length="0.002827889" LineColor="#000000" LineWidth="0.3" ConstantWidth="false" MinLength="4.0" MinSpaceAbove="0.0" MinSpaceBelow="0.0"><PieChartLabel TextColor="#000000" TextHeight="6.0" TextStyle="" FontFamily="Arial" DecimalFormat="#0.0#####" LocaleLang="en" LocaleCountry="" LocaleVariant="" LineColor="#000000" LineWidth="0.3" Width="6.0" Height="6.0" InternalLines="true" NullLines="false" ShowTitle="false" CaptionType="NONE" CaptionLinkType="STRAIGHT_LINES" Id="6" Above="true" LineNo="0" LinePos="0.0"><LabelMargin Left="1.0" Top="1.0" Right="1.0" Bottom="1.0"></LabelMargin><DataIds TextColor="#000000" TextStyle="" FontFamily="Arial" DecimalFormat="#0.0#####" LocaleLang="en" LocaleCountry="" LocaleVariant=""><DataId PieColor="#0000FF" PieCaption="">6.0</DataId><DataId PieColor="#FF0000" PieCaption="">6.1</DataId></DataIds></PieChartLabel><InvisibleData Id="6.0" Text="0.998953" IsDecimal="true"></InvisibleData><InvisibleData Id="6.1" Text="0.001047" IsDecimal="true"></InvisibleData></Branch><Node Text="internalNode48" IsDecimal="false" UniqueName="odhsid64y8" TextColor="#000000" TextHeight="6.0" TextStyle="" FontFamily="Arial" DecimalFormat="#0.0#####" LocaleLang="en" LocaleCountry="" LocaleVariant="" LineColor="#000000" LineWidth="0.3" EdgeRadius="1.0"><LeafMargin Left="1.0" Top="0.3" Right="1.0" Bottom="0.3"></LeafMargin><Branch Length="0.002716934" LineColor="#000000" LineWidth="0.3" ConstantWidth="false" MinLength="4.0" MinSpaceAbove="0.0" MinSpaceBelow="0.0"><PieChartLabel TextColor="#000000" TextHeight="6.0" TextStyle="" FontFamily="Arial" DecimalFormat="#0.0#####" LocaleLang="en" LocaleCountry="" LocaleVariant="" LineColor="#000000" LineWidth="0.3" Width="6.0" Height="6.0" InternalLines="true" NullLines="false" ShowTitle="false" CaptionType="NONE" CaptionLinkType="STRAIGHT_LINES" Id="6" Above="true" LineNo="0" LinePos="0.0"><LabelMargin Left="1.0" Top="1.0" Right="1.0" Bottom="1.0"></LabelMargin><DataIds TextColor="#000000" TextStyle="" FontFamily="Arial" DecimalFormat="#0.0#####" LocaleLang="en" LocaleCountry="" LocaleVariant=""><DataId PieColor="#0000FF" PieCaption="">6.0</DataId><DataId PieColor="#FF0000" PieCaption="">6.1</DataId></DataIds></PieChartLabel><InvisibleData Id="6.0" Text="0.999469" IsDecimal="true"></InvisibleData><InvisibleData Id="6.1" Text="5.31E-4" IsDecimal="true"></InvisibleData></Branch><Node Text="Oxyporus aequicollis PogranFE19 41" IsDecimal="false" UniqueName="8w071nl5h3" TextColor="#000000" TextHeight="6.0" TextStyle="" FontFamily="Arial" DecimalFormat="#0.0#####" LocaleLang="en" LocaleCountry="" LocaleVariant="" LineColor="#000000" LineWidth="0.3" EdgeRadius="1.0"><LeafMargin Left="1.0" Top="0.3" Right="1.0" Bottom="0.3"></LeafMargin><Branch Length="0.001051766" LineColor="#000000" LineWidth="0.3" ConstantWidth="false" MinLength="4.0" MinSpaceAbove="0.0" MinSpaceBelow="0.0"></Branch></Node><Node Text="Oxyporus basicornis AnisimFE19 51" IsDecimal="false" UniqueName="sb9w0273a1" TextColor="#000000" TextHeight="6.0" TextStyle="" FontFamily="Arial" DecimalFormat="#0.0#####" LocaleLang="en" LocaleCountry="" LocaleVariant="" LineColor="#000000" LineWidth="0.3" EdgeRadius="1.0"><LeafMargin Left="1.0" Top="0.3" Right="1.0" Bottom="0.3"></LeafMargin><Branch Length="0.002506712" LineColor="#000000" LineWidth="0.3" ConstantWidth="false" MinLength="4.0" MinSpaceAbove="0.0" MinSpaceBelow="0.0"></Branch></Node></Node><Node Text="Oxyporus germanus dark AnisimFE19 18" IsDecimal="false" UniqueName="qh900b60q6" TextColor="#000000" TextHeight="6.0" TextStyle="" FontFamily="Arial" DecimalFormat="#0.0#####" LocaleLang="en" LocaleCountry="" LocaleVariant="" LineColor="#000000" LineWidth="0.3" EdgeRadius="1.0"><LeafMargin Left="1.0" Top="0.3" Right="1.0" Bottom="0.3"></LeafMargin><Branch Length="0.001902456" LineColor="#000000" LineWidth="0.3" ConstantWidth="false" MinLength="4.0" MinSpaceAbove="0.0" MinSpaceBelow="0.0"></Branch></Node></Node><Node Text="internalNode49" IsDecimal="false" UniqueName="tb9x17pgho" TextColor="#000000" TextHeight="6.0" TextStyle="" FontFamily="Arial" DecimalFormat="#0.0#####" LocaleLang="en" LocaleCountry="" LocaleVariant="" LineColor="#000000" LineWidth="0.3" EdgeRadius="1.0"><LeafMargin Left="1.0" Top="0.3" Right="1.0" Bottom="0.3"></LeafMargin><Branch Length="0.005759409" LineColor="#000000" LineWidth="0.3" ConstantWidth="false" MinLength="4.0" MinSpaceAbove="0.0" MinSpaceBelow="0.0"><PieChartLabel TextColor="#000000" TextHeight="6.0" TextStyle="" FontFamily="Arial" DecimalFormat="#0.0#####" LocaleLang="en" LocaleCountry="" LocaleVariant="" LineColor="#000000" LineWidth="0.3" Width="6.0" Height="6.0" InternalLines="true" NullLines="false" ShowTitle="false" CaptionType="NONE" CaptionLinkType="STRAIGHT_LINES" Id="6" Above="true" LineNo="0" LinePos="0.0"><LabelMargin Left="1.0" Top="1.0" Right="1.0" Bottom="1.0"></LabelMargin><DataIds TextColor="#000000" TextStyle="" FontFamily="Arial" DecimalFormat="#0.0#####" LocaleLang="en" LocaleCountry="" LocaleVariant=""><DataId PieColor="#0000FF" PieCaption="">6.0</DataId><DataId PieColor="#FF0000" PieCaption="">6.1</DataId></DataIds></PieChartLabel><InvisibleData Id="6.0" Text="0.999935" IsDecimal="true"></InvisibleData><InvisibleData Id="6.1" Text="6.5E-5" IsDecimal="true"></InvisibleData></Branch><Node Text="Oxyporus germanus2 CNUIC597" IsDecimal="false" UniqueName="ulz15xutzw" TextColor="#000000" TextHeight="6.0" TextStyle="" FontFamily="Arial" DecimalFormat="#0.0#####" LocaleLang="en" LocaleCountry="" LocaleVariant="" LineColor="#000000" LineWidth="0.3" EdgeRadius="1.0"><LeafMargin Left="1.0" Top="0.3" Right="1.0" Bottom="0.3"></LeafMargin><Branch Length="0.003045975" LineColor="#000000" LineWidth="0.3" ConstantWidth="false" MinLength="4.0" MinSpaceAbove="0.0" MinSpaceBelow="0.0"></Branch></Node><Node Text="Oxyporus germanus3 CNUIC599" IsDecimal="false" UniqueName="k0g3i1jm4j" TextColor="#000000" TextHeight="6.0" TextStyle="" FontFamily="Arial" DecimalFormat="#0.0#####" LocaleLang="en" LocaleCountry="" LocaleVariant="" LineColor="#000000" LineWidth="0.3" EdgeRadius="1.0"><LeafMargin Left="1.0" Top="0.3" Right="1.0" Bottom="0.3"></LeafMargin><Branch Length="0.002450024" LineColor="#000000" LineWidth="0.3" ConstantWidth="false" MinLength="4.0" MinSpaceAbove="0.0" MinSpaceBelow="0.0"></Branch></Node><Node Text="internalNode50" IsDecimal="false" UniqueName="5hlr33v4dt" TextColor="#000000" TextHeight="6.0" TextStyle="" FontFamily="Arial" DecimalFormat="#0.0#####" LocaleLang="en" LocaleCountry="" LocaleVariant="" LineColor="#000000" LineWidth="0.3" EdgeRadius="1.0"><LeafMargin Left="1.0" Top="0.3" Right="1.0" Bottom="0.3"></LeafMargin><Branch Length="0.003057528" LineColor="#000000" LineWidth="0.3" ConstantWidth="false" MinLength="4.0" MinSpaceAbove="0.0" MinSpaceBelow="0.0"><PieChartLabel TextColor="#000000" TextHeight="6.0" TextStyle="" FontFamily="Arial" DecimalFormat="#0.0#####" LocaleLang="en" LocaleCountry="" LocaleVariant="" LineColor="#000000" LineWidth="0.3" Width="6.0" Height="6.0" InternalLines="true" NullLines="false" ShowTitle="false" CaptionType="NONE" CaptionLinkType="STRAIGHT_LINES" Id="6" Above="true" LineNo="0" LinePos="0.0"><LabelMargin Left="1.0" Top="1.0" Right="1.0" Bottom="1.0"></LabelMargin><DataIds TextColor="#000000" TextStyle="" FontFamily="Arial" DecimalFormat="#0.0#####" LocaleLang="en" LocaleCountry="" LocaleVariant=""><DataId PieColor="#0000FF" PieCaption="">6.0</DataId><DataId PieColor="#FF0000" PieCaption="">6.1</DataId></DataIds></PieChartLabel><InvisibleData Id="6.0" Text="0.999146" IsDecimal="true"></InvisibleData><InvisibleData Id="6.1" Text="8.54E-4" IsDecimal="true"></InvisibleData></Branch><Node Text="Oxyporus germanus4 CNUIC600" IsDecimal="false" UniqueName="pyfmrqg00t" TextColor="#000000" TextHeight="6.0" TextStyle="" FontFamily="Arial" DecimalFormat="#0.0#####" LocaleLang="en" LocaleCountry="" LocaleVariant="" LineColor="#000000" LineWidth="0.3" EdgeRadius="1.0"><LeafMargin Left="1.0" Top="0.3" Right="1.0" Bottom="0.3"></LeafMargin><Branch Length="0.004016098" LineColor="#000000" LineWidth="0.3" ConstantWidth="false" MinLength="4.0" MinSpaceAbove="0.0" MinSpaceBelow="0.0"></Branch></Node><Node Text="Oxyporus germanus5 CNUIC640" IsDecimal="false" UniqueName="i0en8ooc5a" TextColor="#000000" TextHeight="6.0" TextStyle="" FontFamily="Arial" DecimalFormat="#0.0#####" LocaleLang="en" LocaleCountry="" LocaleVariant="" LineColor="#000000" LineWidth="0.3" EdgeRadius="1.0"><LeafMargin Left="1.0" Top="0.3" Right="1.0" Bottom="0.3"></LeafMargin><Branch Length="0.001066973" LineColor="#000000" LineWidth="0.3" ConstantWidth="false" MinLength="4.0" MinSpaceAbove="0.0" MinSpaceBelow="0.0"></Branch></Node></Node></Node></Node><Node Text="Oxyporus germanus1 CNUIC515" IsDecimal="false" UniqueName="2uofnnhg3g" TextColor="#000000" TextHeight="6.0" TextStyle="" FontFamily="Arial" DecimalFormat="#0.0#####" LocaleLang="en" LocaleCountry="" LocaleVariant="" LineColor="#000000" LineWidth="0.3" EdgeRadius="1.0"><LeafMargin Left="1.0" Top="0.3" Right="1.0" Bottom="0.3"></LeafMargin><Branch Length="0.008300195" LineColor="#000000" LineWidth="0.3" ConstantWidth="false" MinLength="4.0" MinSpaceAbove="0.0" MinSpaceBelow="0.0"></Branch></Node></Node><Node Text="internalNode51" IsDecimal="false" UniqueName="5fwuj0v6xy" TextColor="#000000" TextHeight="6.0" TextStyle="" FontFamily="Arial" DecimalFormat="#0.0#####" LocaleLang="en" LocaleCountry="" LocaleVariant="" LineColor="#000000" LineWidth="0.3" EdgeRadius="1.0"><LeafMargin Left="1.0" Top="0.3" Right="1.0" Bottom="0.3"></LeafMargin><Branch Length="0.05594781" LineColor="#000000" LineWidth="0.3" ConstantWidth="false" MinLength="4.0" MinSpaceAbove="0.0" MinSpaceBelow="0.0"><PieChartLabel TextColor="#000000" TextHeight="6.0" TextStyle="" FontFamily="Arial" DecimalFormat="#0.0#####" LocaleLang="en" LocaleCountry="" LocaleVariant="" LineColor="#000000" LineWidth="0.3" Width="6.0" Height="6.0" InternalLines="true" NullLines="false" ShowTitle="false" CaptionType="NONE" CaptionLinkType="STRAIGHT_LINES" Id="6" Above="true" LineNo="0" LinePos="0.0"><LabelMargin Left="1.0" Top="1.0" Right="1.0" Bottom="1.0"></LabelMargin><DataIds TextColor="#000000" TextStyle="" FontFamily="Arial" DecimalFormat="#0.0#####" LocaleLang="en" LocaleCountry="" LocaleVariant=""><DataId PieColor="#0000FF" PieCaption="">6.0</DataId><DataId PieColor="#FF0000" PieCaption="">6.1</DataId></DataIds></PieChartLabel><InvisibleData Id="6.0" Text="0.999999" IsDecimal="true"></InvisibleData><InvisibleData Id="6.1" Text="1.0E-6" IsDecimal="true"></InvisibleData></Branch><Node Text="internalNode52" IsDecimal="false" UniqueName="ibnri0bhgh" TextColor="#000000" TextHeight="6.0" TextStyle="" FontFamily="Arial" DecimalFormat="#0.0#####" LocaleLang="en" LocaleCountry="" LocaleVariant="" LineColor="#000000" LineWidth="0.3" EdgeRadius="1.0"><LeafMargin Left="1.0" Top="0.3" Right="1.0" Bottom="0.3"></LeafMargin><Branch Length="0.005363108" LineColor="#000000" LineWidth="0.3" ConstantWidth="false" MinLength="4.0" MinSpaceAbove="0.0" MinSpaceBelow="0.0"><PieChartLabel TextColor="#000000" TextHeight="6.0" TextStyle="" FontFamily="Arial" DecimalFormat="#0.0#####" LocaleLang="en" LocaleCountry="" LocaleVariant="" LineColor="#000000" LineWidth="0.3" Width="6.0" Height="6.0" InternalLines="true" NullLines="false" ShowTitle="false" CaptionType="NONE" CaptionLinkType="STRAIGHT_LINES" Id="6" Above="true" LineNo="0" LinePos="0.0"><LabelMargin Left="1.0" Top="1.0" Right="1.0" Bottom="1.0"></LabelMargin><DataIds TextColor="#000000" TextStyle="" FontFamily="Arial" DecimalFormat="#0.0#####" LocaleLang="en" LocaleCountry="" LocaleVariant=""><DataId PieColor="#0000FF" PieCaption="">6.0</DataId><DataId PieColor="#FF0000" PieCaption="">6.1</DataId></DataIds></PieChartLabel><InvisibleData Id="6.0" Text="1.0" IsDecimal="true"></InvisibleData><InvisibleData Id="6.1" Text="0.0" IsDecimal="true"></InvisibleData></Branch><Node Text="Oxyporus rufus Bor19 35" IsDecimal="false" UniqueName="1kdkaid8yx" TextColor="#000000" TextHeight="6.0" TextStyle="" FontFamily="Arial" DecimalFormat="#0.0#####" LocaleLang="en" LocaleCountry="" LocaleVariant="" LineColor="#000000" LineWidth="0.3" EdgeRadius="1.0"><LeafMargin Left="1.0" Top="0.3" Right="1.0" Bottom="0.3"></LeafMargin><Branch Length="0.002493184" LineColor="#000000" LineWidth="0.3" ConstantWidth="false" MinLength="4.0" MinSpaceAbove="0.0" MinSpaceBelow="0.0"></Branch></Node><Node Text="Oxyporus rufus GornTaezhFE18 09" IsDecimal="false" UniqueName="k664ojod1e" TextColor="#000000" TextHeight="6.0" TextStyle="" FontFamily="Arial" DecimalFormat="#0.0#####" LocaleLang="en" LocaleCountry="" LocaleVariant="" LineColor="#000000" LineWidth="0.3" EdgeRadius="1.0"><LeafMargin Left="1.0" Top="0.3" Right="1.0" Bottom="0.3"></LeafMargin><Branch Length="0.00102175" LineColor="#000000" LineWidth="0.3" ConstantWidth="false" MinLength="4.0" MinSpaceAbove="0.0" MinSpaceBelow="0.0"></Branch></Node><Node Text="Oxyporus rufus NCBI Finl KJ965221 1" IsDecimal="false" UniqueName="600trdbp2t" TextColor="#000000" TextHeight="6.0" TextStyle="" FontFamily="Arial" DecimalFormat="#0.0#####" LocaleLang="en" LocaleCountry="" LocaleVariant="" LineColor="#000000" LineWidth="0.3" EdgeRadius="1.0"><LeafMargin Left="1.0" Top="0.3" Right="1.0" Bottom="0.3"></LeafMargin><Branch Length="0.001103536" LineColor="#000000" LineWidth="0.3" ConstantWidth="false" MinLength="4.0" MinSpaceAbove="0.0" MinSpaceBelow="0.0"></Branch></Node><Node Text="Oxyporus rufus ZMUO NCBI Finl KJ966577 1" IsDecimal="false" UniqueName="jww633ekvz" TextColor="#000000" TextHeight="6.0" TextStyle="" FontFamily="Arial" DecimalFormat="#0.0#####" LocaleLang="en" LocaleCountry="" LocaleVariant="" LineColor="#000000" LineWidth="0.3" EdgeRadius="1.0"><LeafMargin Left="1.0" Top="0.3" Right="1.0" Bottom="0.3"></LeafMargin><Branch Length="0.001109042" LineColor="#000000" LineWidth="0.3" ConstantWidth="false" MinLength="4.0" MinSpaceAbove="0.0" MinSpaceBelow="0.0"></Branch></Node><Node Text="Oxyporus rufus1 KJ964395" IsDecimal="false" UniqueName="nlyqskyoxu" TextColor="#000000" TextHeight="6.0" TextStyle="" FontFamily="Arial" DecimalFormat="#0.0#####" LocaleLang="en" LocaleCountry="" LocaleVariant="" LineColor="#000000" LineWidth="0.3" EdgeRadius="1.0"><LeafMargin Left="1.0" Top="0.3" Right="1.0" Bottom="0.3"></LeafMargin><Branch Length="0.002433899" LineColor="#000000" LineWidth="0.3" ConstantWidth="false" MinLength="4.0" MinSpaceAbove="0.0" MinSpaceBelow="0.0"></Branch></Node><Node Text="Oxyporus rufus2 KJ965221" IsDecimal="false" UniqueName="o06fd1f29q" TextColor="#000000" TextHeight="6.0" TextStyle="" FontFamily="Arial" DecimalFormat="#0.0#####" LocaleLang="en" LocaleCountry="" LocaleVariant="" LineColor="#000000" LineWidth="0.3" EdgeRadius="1.0"><LeafMargin Left="1.0" Top="0.3" Right="1.0" Bottom="0.3"></LeafMargin><Branch Length="0.001034642" LineColor="#000000" LineWidth="0.3" ConstantWidth="false" MinLength="4.0" MinSpaceAbove="0.0" MinSpaceBelow="0.0"></Branch></Node><Node Text="Oxyporus rufus3 KJ966577" IsDecimal="false" UniqueName="hl9n3acax3" TextColor="#000000" TextHeight="6.0" TextStyle="" FontFamily="Arial" DecimalFormat="#0.0#####" LocaleLang="en" LocaleCountry="" LocaleVariant="" LineColor="#000000" LineWidth="0.3" EdgeRadius="1.0"><LeafMargin Left="1.0" Top="0.3" Right="1.0" Bottom="0.3"></LeafMargin><Branch Length="0.001034602" LineColor="#000000" LineWidth="0.3" ConstantWidth="false" MinLength="4.0" MinSpaceAbove="0.0" MinSpaceBelow="0.0"></Branch></Node></Node><Node Text="Oxyporus rufus NCBI Germ KU906276 1" IsDecimal="false" UniqueName="2bun6m3q1j" TextColor="#000000" TextHeight="6.0" TextStyle="" FontFamily="Arial" DecimalFormat="#0.0#####" LocaleLang="en" LocaleCountry="" LocaleVariant="" LineColor="#000000" LineWidth="0.3" EdgeRadius="1.0"><LeafMargin Left="1.0" Top="0.3" Right="1.0" Bottom="0.3"></LeafMargin><Branch Length="0.001116525" LineColor="#000000" LineWidth="0.3" ConstantWidth="false" MinLength="4.0" MinSpaceAbove="0.0" MinSpaceBelow="0.0"></Branch></Node><Node Text="Oxyporus rufus NCBI Germ KU915441 1" IsDecimal="false" UniqueName="i64zxnever" TextColor="#000000" TextHeight="6.0" TextStyle="" FontFamily="Arial" DecimalFormat="#0.0#####" LocaleLang="en" LocaleCountry="" LocaleVariant="" LineColor="#000000" LineWidth="0.3" EdgeRadius="1.0"><LeafMargin Left="1.0" Top="0.3" Right="1.0" Bottom="0.3"></LeafMargin><Branch Length="0.001143182" LineColor="#000000" LineWidth="0.3" ConstantWidth="false" MinLength="4.0" MinSpaceAbove="0.0" MinSpaceBelow="0.0"></Branch></Node><Node Text="Oxyporus rufus Petergof18 34" IsDecimal="false" UniqueName="uficjdur2k" TextColor="#000000" TextHeight="6.0" TextStyle="" FontFamily="Arial" DecimalFormat="#0.0#####" LocaleLang="en" LocaleCountry="" LocaleVariant="" LineColor="#000000" LineWidth="0.3" EdgeRadius="1.0"><LeafMargin Left="1.0" Top="0.3" Right="1.0" Bottom="0.3"></LeafMargin><Branch Length="0.003370751" LineColor="#000000" LineWidth="0.3" ConstantWidth="false" MinLength="4.0" MinSpaceAbove="0.0" MinSpaceBelow="0.0"></Branch></Node></Node></Node></Node><Node Text="internalNode53" IsDecimal="false" UniqueName="pxy46ejyb6" TextColor="#000000" TextHeight="6.0" TextStyle="" FontFamily="Arial" DecimalFormat="#0.0#####" LocaleLang="en" LocaleCountry="" LocaleVariant="" LineColor="#000000" LineWidth="0.3" EdgeRadius="1.0"><LeafMargin Left="1.0" Top="0.3" Right="1.0" Bottom="0.3"></LeafMargin><Branch Length="0.07839028" LineColor="#000000" LineWidth="0.3" ConstantWidth="false" MinLength="4.0" MinSpaceAbove="0.0" MinSpaceBelow="0.0"><PieChartLabel TextColor="#000000" TextHeight="6.0" TextStyle="" FontFamily="Arial" DecimalFormat="#0.0#####" LocaleLang="en" LocaleCountry="" LocaleVariant="" LineColor="#000000" LineWidth="0.3" Width="6.0" Height="6.0" InternalLines="true" NullLines="false" ShowTitle="false" CaptionType="NONE" CaptionLinkType="STRAIGHT_LINES" Id="6" Above="true" LineNo="0" LinePos="0.0"><LabelMargin Left="1.0" Top="1.0" Right="1.0" Bottom="1.0"></LabelMargin><DataIds TextColor="#000000" TextStyle="" FontFamily="Arial" DecimalFormat="#0.0#####" LocaleLang="en" LocaleCountry="" LocaleVariant=""><DataId PieColor="#0000FF" PieCaption="">6.0</DataId><DataId PieColor="#FF0000" PieCaption="">6.1</DataId></DataIds></PieChartLabel><InvisibleData Id="6.0" Text="0.999997" IsDecimal="true"></InvisibleData><InvisibleData Id="6.1" Text="3.0E-6" IsDecimal="true"></InvisibleData></Branch><Node Text="Oxyporus mannerheimii AnisimFE19 06" IsDecimal="false" UniqueName="cmhdieffpw" TextColor="#000000" TextHeight="6.0" TextStyle="" FontFamily="Arial" DecimalFormat="#0.0#####" LocaleLang="en" LocaleCountry="" LocaleVariant="" LineColor="#000000" LineWidth="0.3" EdgeRadius="1.0"><LeafMargin Left="1.0" Top="0.3" Right="1.0" Bottom="0.3"></LeafMargin><Branch Length="0.001022218" LineColor="#000000" LineWidth="0.3" ConstantWidth="false" MinLength="4.0" MinSpaceAbove="0.0" MinSpaceBelow="0.0"></Branch></Node><Node Text="Oxyporus mannerheimii Sverdl19 16" IsDecimal="false" UniqueName="gffv15cdnm" TextColor="#000000" TextHeight="6.0" TextStyle="" FontFamily="Arial" DecimalFormat="#0.0#####" LocaleLang="en" LocaleCountry="" LocaleVariant="" LineColor="#000000" LineWidth="0.3" EdgeRadius="1.0"><LeafMargin Left="1.0" Top="0.3" Right="1.0" Bottom="0.3"></LeafMargin><Branch Length="0.00103873" LineColor="#000000" LineWidth="0.3" ConstantWidth="false" MinLength="4.0" MinSpaceAbove="0.0" MinSpaceBelow="0.0"></Branch></Node><Node Text="Oxyporus mannerheimii TolmachLO18 26" IsDecimal="false" UniqueName="plz77phmy8" TextColor="#000000" TextHeight="6.0" TextStyle="" FontFamily="Arial" DecimalFormat="#0.0#####" LocaleLang="en" LocaleCountry="" LocaleVariant="" LineColor="#000000" LineWidth="0.3" EdgeRadius="1.0"><LeafMargin Left="1.0" Top="0.3" Right="1.0" Bottom="0.3"></LeafMargin><Branch Length="0.001024498" LineColor="#000000" LineWidth="0.3" ConstantWidth="false" MinLength="4.0" MinSpaceAbove="0.0" MinSpaceBelow="0.0"></Branch></Node></Node></Node></Node><Node Text="Philonthus tenuicornis KU918645 1" IsDecimal="false" UniqueName="xqbez7q4wi" TextColor="#000000" TextHeight="6.0" TextStyle="" FontFamily="Arial" DecimalFormat="#0.0#####" LocaleLang="en" LocaleCountry="" LocaleVariant="" LineColor="#000000" LineWidth="0.3" EdgeRadius="1.0"><LeafMargin Left="1.0" Top="0.3" Right="1.0" Bottom="0.3"></LeafMargin><Branch Length="0.1401961" LineColor="#000000" LineWidth="0.3" ConstantWidth="false" MinLength="4.0" MinSpaceAbove="0.0" MinSpaceBelow="0.0"></Branch></Node></Node></Node><ScaleBar LineColor="#000000" LineWidth="0.3" TextColor="#000000" TextHeight="4.0" TextStyle="" FontFamily="Arial" DecimalFormat="#0.0#####" LocaleLang="en" LocaleCountry="" LocaleVariant="" Align="left" TreeDistance="2.0" Width="20.0mm" Height="3.0" SmallInterval="0.003" LongInterval="10" StartLeft="true" Increasing="true"></ScaleBar></Tree></TreegraphDocument>
